# Supplementary material for: Comparative Proteomics Analysis of Pig Muscle Exudate through Label-Free Liquid Chromatography-Mass Spectrometry
Source: Animals (Basel). 2023 Apr 25;13(9):1460. doi: 10.3390/ani13091460 (PMC10177093; doi:10.3390/ani13091460)
Supplement: Supplementary file 1 [file animals-13-01460-s001.zip › Supplementary Table S1.xlsx]

## Sheet: S1 Table
Uniprot acession	Protein description	∑Coverage % by amino acid	a)PSMs	b)Unique Peptides	c)MW [kDa]
R4H1Z8	Adipocyte fatty acid-binding protein	48	34	7	14.7
Q9N0M7	Micromolar calcium-activated neutral protease 1 isoform B	40	66	22	74
Q9GMA7	Alpha-1-antichymotrypsin 1 (Fragment)	29	18	3	24.7
Q9GMA6	Alpha-1-antichymotrypsin 2	39	43	4	46.6
Q9G1G3	Cytochrome c oxidase subunit 2	16	4	3	26.4
Q9BDC3	p27Kip1	19	3	2	22.2
Q95KQ9	Cystatin B (Fragment)	48	5	1	2.9
Q8WMK2	Muscle creatine kinase (Fragment)	79	384	3	16.5
Q8MHY0	MYL2	33	10	6	18.9
Q8HZW2	Myocilin	17	12	6	55
Q8HXL4	Cytoskeleton-associated protein 1	11	4	2	27.5
Q75NH3	Troponin T fast skeletal muscle type	24	30	1	32.1
Q6YT39	Lactotransferrin	7	9	2	77.6
Q6WL01	LIM and cysteine-rich domains 1 (Fragment)	30	4	1	4.3
Q6QAS5	60S ribosomal protein L12 (Fragment)	25	3	3	20.8
Q68RU1	Ovarian and testicular apolipoprotein N	26	15	6	28.6
Q684M6	CDC37 cell division cycle 37 protein	29	26	8	44.5
Q58G70	Fatty acid synthase (Fragment)	35	94	1	261.2
Q56P20	ADP-ribosylation factor 4	27	14	2	20.5
Q31064	MHC class II DR-alpha (Fragment)	4	1	1	28.5
Q2VTP6	Peptidylprolyl isomerase	30	50	5	11.9
Q2TJA5	Aldo-keto reductase	68	109	19	36.7
Q2TCH2	Perilipin	18	7	6	55
Q2PYM7	Proteasome subunit beta	7	1	1	23.3
Q2HYU1	Creatine kinase, mitochondrial 2	45	88	16	47.4
Q29583	Glutathione transferase mu (Fragment)	34	28	3	14.4
Q29272	Succinate dehydrogenase (Fragment)	10	3	1	16.7
Q29233	Interferon-induced guanylate-binding protein 1 (Fragment)	19	3	2	11.4
Q28939	Vascular cell adhesion molecule	2	1	1	58.8
Q1T7A8	Type VI collagen alpha-1 chain (Fragment)	14	1	1	12.7
Q1AG08	Calsarcin 1	6	3	1	29.9
Q19QT8	Quinone oxidoreductase	36	38	9	35.2
Q19PY1	Alpha-1,4 glucan phosphorylase (Fragment)	70	412	1	84
Q0R678	DJ-1 protein	70	102	14	19.9
Q0QEV2	Ribosomal protein L18 (Fragment)	15	2	2	18.9
Q0PY11	Elongation factor 1-alpha	37	55	5	50.1
Q0PM28	Pigment epithelium-derived factor	32	31	11	45.6
Q06AS6	G protein subunit alpha i2	4	1	1	40.4
Q06AB2	UBC1	27	15	5	22.4
Q06AA8	UB2D1	20	6	1	16.6
P79322	cAMP-regulated phosphoprotein 19k (Fragment)	24	5	1	12.2
P79319	Cytochrome C oxidase polypeptide VB (Fragment)	32	3	2	8.3
O97771	Titin (Fragment)	22	6	3	24.4
O77657	Fructose-1,6-bisphosphatase (Fragment)	42	30	9	36.6
M9MMN4	Succinyl-CoA:3-ketoacid-coenzyme A transferase	18	15	7	51.2
M3VK13	Eukaryotic translation initiation factor 5 tv1	19	19	7	49.1
M3VH45	Annexin	56	126	2	75.8
M3V862	Nuclear transcription factor Y, alpha tv1	9	2	1	22
M3V836	Glutathione S-transferase pi 1	60	48	9	23.6
M3UZ42	Ubiquitin-fold modifier 1	18	1	1	9.1
M3TYU5	WD repeat domain 44	3	5	2	101.2
M3TYR4	Mitogen-activated protein kinase kinase 3	26	12	6	39.2
L8B180	IgG heavy chain	45	223	3	50.8
L8B173	IgG heavy chain	51	128	1	51.5
L8B149	IgG heavy chain	46	116	1	51.7
L8B139	IgG heavy chain	45	151	1	50.7
L8B0Y6	IgG heavy chain	38	161	2	52.3
L8B0W9	IgG heavy chain	39	162	1	51.1
L8B0W4	IgG heavy chain	41	133	2	52.8
L8B0W0	IgG heavy chain	47	195	1	50.7
L8B0V6	IgG heavy chain	49	157	2	52.3
L8B0V2	IgG heavy chain	33	123	3	52.6
L8B0U8	IgG heavy chain	49	129	1	50.9
L8B0U1	IgG heavy chain	43	155	1	51.1
L8B0T7	IgG heavy chain	41	101	2	52.2
L8B0S7	IgG heavy chain	41	153	1	52.8
L8B0S2	IgG heavy chain	54	160	7	51.5
L8B0R9	IgG heavy chain	45	238	1	49.5
L8AXL3	IgG heavy chain	46	128	1	50.8
L8AXK3	IgG heavy chain	49	126	1	51.4
K9J6H8	Alpha-2-macroglobulin	55	297	3	163.9
K9IWG9	Tensin-1	1	1	1	183.5
K9IW73	Dihydrolipoyllysine-residue succinyltransferase	10	11	4	49
K9IW70	Acetyltransferase component of pyruvate dehydrogenase complex	13	13	5	69.1
K9IVW4	Myotrophin	43	14	3	12.9
K9IVR7	WD repeat domain 1	60	126	25	66.1
K9IVP8	Obg-like ATPase 1	38	50	14	44.7
K9IVP5	N-myosin-9	11	21	15	226.3
K9IVF7	X-prolyl aminopeptidase (Aminopeptidase P) 1, soluble	19	23	9	74.6
K9IVF4	Selenide, water dikinase 1 isoform 1	3	1	1	42.9
K7ZRK0	IgA heavy chian constant region (Fragment)	41	53	12	36.6
K7ZPU8	IgG heavy chian constant region (Fragment)	65	95	7	35.8
K7GT00	Collagen type XIV alpha 1 chain	4	7	6	191.9
K7GRY0	Ubiquitin like modifier activating enzyme 1	39	98	30	117.7
K7GRV5	Galectin	4	1	1	27.5
K7GRN9	Uncharacterized protein	1	1	1	103.3
K7GRB9	Uncharacterized protein	2	1	1	63.2
K7GR72	Anion exchange protein	5	8	4	103.8
K7GQS5	Plastin 3	17	21	3	64.8
K7GQR1	Complement factor properdin	9	9	3	54.1
K7GQL2	Coagulation factor XIII A chain	10	8	5	83.3
K7GQF9	Arachidonate 15-lipoxygenase	3	3	2	88.4
K7GQ50	Protein S100	16	7	1	10.5
K7GQ35	Uncharacterized protein	6	1	1	39
K7GP28	Hydroxysteroid 17-beta dehydrogenase 10	4	1	1	30.8
K7GNZ3	Uncharacterized protein	26	14	4	23.4
K7GNY9	Prefoldin subunit 3	13	8	3	26.5
K7GNL4	Hydroxysteroid dehydrogenase like 2	3	1	1	48.2
K7GND8	Clusterin	44	74	18	51.9
K7GNA5	Uncharacterized protein	7	3	2	39
K7GMZ8	Ceruloplasmin	45	214	45	121.8
K7GMY6	Serine/threonine-protein phosphatase	3	2	1	59.4
K7GM40	Apolipoprotein A-I	69	86	20	30.3
K7GLT8	ATP synthase subunit beta	35	50	14	60.8
K7GLP9	Uncharacterized protein	15	4	3	41.2
K7GLH4	TatD DNase domain containing 1	3	1	1	37.8
K7GKW6	Pirin	8	4	1	32.2
K4EJ64	MYL3	74	37	11	21.8
J9JIK8	Protein-L-isoaspartate	49	41	11	30.3
J9JIK5	Acylphosphatase	12	8	2	16
I7KJP5	HN1-like protein	16	4	2	19.8
I6YP72	Glycogen synthase kinase 3 beta	5	2	1	48
I3LVS7	Ras homolog family member A	28	15	1	21.8
I3LVP1	Uncharacterized protein	38	15	3	11.7
I3LVF5	Uncharacterized protein	20	14	6	43.8
I3LVD5	Actin gamma 1	66	163	7	41.8
I3LV50	Phospholipase A(2)	9	1	1	16.2
I3LUR7	Collagen type VI alpha 3 chain	3	9	6	317.6
I3LUJ5	Calponin	3	2	1	36.7
I3LUE6	CDV3 homolog	36	13	6	28.4
I3LUD5	UBX domain protein 1	20	7	3	33.4
I3LUD1	Superoxide dismutase [Cu-Zn]	13	10	3	32.4
I3LU89	Uncharacterized protein	5	2	1	21.7
I3LTZ8	Phenazine biosynthesis like protein domain containing	34	12	6	31.8
I3LTC6	Inositol-1-monophosphatase	36	36	12	30.2
I3LT95	Proteasome assembly chaperone 1	6	1	1	32.8
I3LT50	Espin	1	1	1	91.5
I3LT08	Eukaryotic translation elongation factor 1 delta	17	24	6	59.3
I3LSZ5	Uridine phosphorylase	10	2	2	33.5
I3LSY9	Polysaccharide biosynthesis domain containing 1	11	2	2	26.8
I3LSP1	Methionine aminopeptidase 2	5	2	1	52.8
I3LSD3	60S ribosomal protein L13	10	4	2	24.3
I3LS97	Uncharacterized protein	32	9	5	25.4
I3LS73	Translocase of inner mitochondrial membrane 13	15	1	1	10.5
I3LS60	ATP-dependent (S)-NAD(P)H-hydrate dehydratase	22	14	5	36.4
I3LS53	Phosphotriesterase related	40	18	9	33.5
I3LRS8	Phosphatidylinositol transfer protein alpha	23	11	4	31.1
I3LRS5	Aldehyde dehydrogenase 1 family member A1	63	78	19	54.8
I3LRP4	PDZ domain containing 2	1	1	1	257.8
I3LRJ4	Vitamin K-dependent protein C	29	33	10	51.9
I3LRG2	Uncharacterized protein	15	4	3	32.5
I3LRD5	Uncharacterized protein	9	2	1	27.3
I3LR66	Dynamin 1 like	12	18	7	83.3
I3LR51	Peptidylprolyl isomerase	48	53	12	29
I3LR41	Ring finger protein 7	11	4	1	12.7
I3LR32	T-complex protein 1 subunit epsilon	11	9	5	59.6
I3LR17	Coronin	15	17	6	50.9
I3LQS0	Heterogeneous nuclear ribonucleoprotein K	29	26	9	48.5
I3LQN4	Uncharacterized protein	4	2	1	33.4
I3LQH7	Biliverdin reductase B	68	40	9	22.2
I3LQD3	Calpain-2 catalytic subunit	22	56	12	79.8
I3LQA8	Microtubule associated protein RP/EB family member 3	6	2	1	32
I3LQ17	Uncharacterized protein	43	205	3	150.4
I3LPY8	Pantothenate kinase 4	3	3	2	86.1
I3LPP4	Chromosome segregation 1 like	12	9	8	110.6
I3LPB5	Creatine kinase B-type	39	17	9	42.7
I3LP41	Malate dehydrogenase	49	64	15	42
I3LP37	Uncharacterized protein	2	1	1	106.2
I3LP02	Acetyl-CoA acetyltransferase 1	29	35	8	45.3
I3LNK5	G1 to S phase transition 1	5	4	3	69
I3LNG8	Stress induced phosphoprotein 1	40	84	23	62.4
I3LNC7	Hikeshi, heat shock protein nuclear import factor	16	10	3	21.6
I3LNB4	Uncharacterized protein	10	5	4	61.8
I3LN42	GC, vitamin D binding protein	58	93	22	53.1
I3LLY4	N-ribosyldihydronicotinamide:quinone reductase 2	7	4	1	26.1
I3LLU0	Glycerol-3-phosphate dehydrogenase [NAD(+)]	40	36	10	38.2
I3LLP5	Uncharacterized protein	5	3	2	37.6
I3LLH5	Peptidyl-prolyl cis-trans isomerase	33	3	3	18.3
I3LL97	Cysteine and glycine rich protein 1	36	12	5	20.6
I3LKY5	N-myc and STAT interactor	5	2	1	29.9
I3LKU0	Rac family small GTPase 2	18	8	1	21.4
I3LKM9	Legumain	2	1	1	49.7
I3LK68	ATP-dependent 6-phosphofructokinase	6	9	3	86.1
I3LK62	Aldehyde dehydrogenase 1 family member A2	4	3	1	56.6
I3LK59	Enolase 1	58	185	1	47.3
I3LK50	Aldehyde dehydrogenase 1 family member A3	8	12	2	56.2
I3LJT9	Protein phosphatase methylesterase 1	11	10	4	39.7
I3LJI1	Uncharacterized protein	9	2	1	15.4
I3LJE2	Dihydropyrimidinase like 2	42	70	17	73.5
I3LJ87	Uncharacterized protein	12	4	3	31.2
I3LJ73	Guanine monophosphate synthase	2	1	1	77.4
I3LJ52	Uncharacterized protein	8	2	2	27.5
I3LIN5	Ubiquitin specific peptidase 14	34	34	13	55.9
I3LIM2	UDP-glucose 6-dehydrogenase	17	20	7	55
I3LII3	Eukaryotic translation elongation factor 2	34	81	26	95.8
I3LIH2	Inositol-1-monophosphatase	13	8	2	29.9
I3LIE7	Myosin binding protein H	31	21	8	55.3
I3LIB5	Myopalladin	1	1	1	144.6
I3LI59	RNA-binding protein 8A	11	1	1	19.9
I3LHS7	Coenzyme Q9	7	4	1	35.4
I3LHP2	Lysophospholipase II	9	5	2	29.9
I3LHC8	3-hydroxybutyrate dehydrogenase 2	34	21	8	26.6
I3LGJ4	Uncharacterized protein	8	1	1	31.4
I3LGI8	Ficolin-2	6	5	2	34.7
I3LGH6	Dipeptidyl peptidase 3	28	45	17	84.6
I3LG08	Dystrophin	0	1	1	423.3
I3LFZ7	Ring finger protein 123	1	1	1	148.1
I3LFV4	Uncharacterized protein	17	9	2	41.5
I3LFR2	Cullin 5	13	22	9	90.9
I3LFE8	Pyrophosphatase (inorganic) 2	13	8	4	38.7
I3LF89	Carboxypeptidase N subunit 2	12	14	5	61.1
I3LF44	Uncharacterized protein	12	8	3	35.4
I3LEY2	Annexin	29	45	13	51.9
I3LEV7	Uncharacterized protein	6	2	1	22.1
I3LER5	Cytochrome c oxidase subunit 4 isoform 1, mitochondrial	13	3	2	19.6
I3LEQ7	Serine/threonine kinase receptor associated protein	30	18	7	38.5
I3LEN7	10-formyltetrahydrofolate dehydrogenase	19	18	12	98.8
I3LEK4	Uncharacterized protein	4	1	1	33.7
I3LEJ3	RNA binding motif protein 20	2	2	1	121.4
I3LEI8	1,2-dihydroxy-3-keto-5-methylthiopentene dioxygenase	51	25	7	21.6
I3LEF2	Nucleoredoxin	4	1	1	48.6
I3LEE6	Procollagen C-endopeptidase enhancer	7	4	2	50
I3LEC2	Poly(rC) binding protein 1	36	35	5	37.5
I3LE83	Uncharacterized protein	7	1	1	27.1
I3LDY2	Uncharacterized protein	8	5	2	32.6
I3LDV0	DEAD-box helicase 3 Y-linked	2	1	1	74.4
I3LDS3	Keratin 10	15	43	9	58.9
I3LDM7	Lactoylglutathione lyase	60	57	11	20.7
I3LDH5	Uncharacterized protein	2	2	2	147.7
I3LDC7	Isocitrate dehydrogenase [NADP]	40	55	13	46.7
I3LDC1	Succinate dehydrogenase [ubiquinone] iron-sulfur subunit, mitochondrial	5	1	1	31.6
I3LDA5	EH domain containing 4	2	1	1	61.2
I3LD74	60S ribosomal protein L11	5	1	1	20.3
I3LD72	EH domain containing 2	25	28	10	61.2
I3LD43	Cytosol aminopeptidase	54	104	27	56
I3LCX3	Dual specificity phosphatase 3	45	23	6	20.5
I3LCU9	Calcium regulated heat stable protein 1	11	1	1	15.8
I3LCP8	Serpin family B member 6	22	20	6	42.8
I3LCN1	Enolase 2	13	50	1	47.2
I3LCI2	Pyruvate dehydrogenase E1 component subunit alpha	16	11	6	43.3
I3LCG9	AMP deaminase	12	16	6	89.7
I3LCC7	Glutathione peroxidase	30	11	5	20.5
I3LCA2	Chaperonin containing TCP1 subunit 8	22	13	10	59.9
I3LC92	Enolase superfamily member 1	13	6	5	49.6
I3LC10	Acylphosphatase	43	21	6	14.1
I3LC00	Uncharacterized protein	6	4	1	45.8
I3LBR2	Interleukin 1 receptor like 2	2	1	1	73.4
I3LBF1	Serotransferrin	59	166	28	77.6
I3LBD3	Testis specific serine kinase 4	2	4	1	37.9
I3LBB2	Vacuolar protein sorting-associated protein 35	5	4	3	91.6
I3LAB6	Proteasome subunit alpha type	14	8	2	25.9
I3L9V2	Vesicle amine transport 1	21	6	5	42.7
I3L9N5	Proteasome 26S subunit, non-ATPase 5	14	15	6	56.1
I3L9N1	ADP-ribosylhydrolase like 1	18	5	4	39.8
I3L9K5	Nuclear casein kinase and cyclin dependent kinase substrate 1	8	2	1	28.1
I3L9I6	Basal cell adhesion molecule (Lutheran blood group)	5	4	3	67.2
I3L9C8	Integrin linked kinase	2	1	1	51.4
I3L920	Coronin	3	2	1	57.3
I3L8U8	Secernin 3	26	30	9	48.3
I3L8R9	Phosphorylase b kinase regulatory subunit	5	6	5	138.7
I3L8K3	Uncharacterized protein	4	1	1	22.7
I3L8J2	Galectin	30	12	4	18.9
I3L8I5	Eukaryotic translation initiation factor 6	22	5	3	26.6
I3L8H4	Thrombospondin 4	14	14	9	107.5
I3L825	BLOC-1 related complex subunit 6	4	1	1	37.3
I3L804	Tyrosine--tRNA ligase	17	21	8	59
I3L7Z6	Protein S100	17	8	2	10.1
I3L7P7	Uncharacterized protein	47	17	3	11.7
I3L7K2	Phosphoinositide phospholipase C	2	2	1	85.8
I3L7H0	DCN1-like protein	17	8	4	30.1
I3L728	Uncharacterized protein	50	20	2	15
I3L704	Anamorsin	11	6	3	33.4
I3L6X7	Vacuolar-sorting protein SNF8	5	2	1	28.9
I3L6T2	Uncharacterized protein	43	14	2	16.4
I3L6Q6	Coagulation factor XIII B chain	2	1	1	73.8
I3L6D8	Uncharacterized protein	66	13	4	12.6
I3L677	Glucose-6-phosphate 1-dehydrogenase	7	4	3	63.3
I3L660	Profilin	36	24	5	15
I3L638	Vitronectin	29	25	10	52.4
I3L5Y5	SH3 and cysteine rich domain 3	3	1	1	41.7
I3L5V7	Glia maturation factor beta	26	2	2	16.7
I3L5P4	Uncharacterized protein	11	2	2	23.8
I3L5M8	Cullin 4B	1	1	1	103.8
I3L5M7	Dual specificity phosphatase 28	6	1	1	18.2
I3L5D4	Uncharacterized protein	8	10	1	44.5
H8Y100	Ubiquitin conjugating enzyme E2 B	11	2	1	17.3
H6TBN0	Thioredoxin	66	26	7	11.8
G9M4N3	Toll-interacting protein	11	3	2	29.9
G9K122	Macrophage mannose receptor C type-1	1	1	1	165.5
G9JM01	Tumor susceptibility 101 protein	4	1	1	44
G9F6X8	Protein disulfide-isomerase	22	27	9	56.4
G9B792	Ankyrin repeat domain-containing protein 2	57	71	16	36.6
G3CKJ2	Glyceraldehyde-3-phosphate dehydrogenase (Fragment)	28	62	2	29.5
F8SUW1	Ubiquitin carboxyl-terminal hydrolase (Fragment)	53	31	6	19.8
F6QAE4	TP53RK binding protein	6	1	1	21.3
F6Q5P0	40S ribosomal protein S13	9	1	1	17.2
F6Q469	Uncharacterized protein	32	43	3	46.3
F6Q109	Glutamine synthetase	17	7	4	42.9
F6PYW2	Histone cluster 1 H1 family member d	8	3	2	27.7
F6PXR6	Uncharacterized protein	70	179	28	36.4
F6PVY0	Uncharacterized protein	35	26	7	26
F6PU32	Calpastatin	28	43	15	89.7
F2Z5W4	Heterogeneous nuclear ribonucleoprotein H3	5	1	1	36.9
F2Z5W2	Cell division control protein 42 homolog	17	11	2	21.3
F2Z5V1	Translation machinery associated 7 homolog	16	4	1	7.1
F2Z5T7	Peptidyl-prolyl cis-trans isomerase	9	1	1	18.1
F2Z5R6	Uncharacterized protein	7	12	7	125.7
F2Z5Q3	COP9 signalosome subunit 7A	8	6	2	30.3
F2Z5N6	Serine/threonine-protein phosphatase	5	1	1	35.1
F2Z5N0	Proteasome subunit alpha type	50	33	10	27.4
F2Z5L7	Proteasome subunit alpha type	41	29	8	29.5
F2Z5K4	Ras homolog family member C	28	17	1	22
F2Z5K3	RAP1A, member of RAS oncogene family	18	7	1	21
F2Z5K2	Proteasome subunit alpha type	42	30	7	26.4
F2Z5J9	Uncharacterized protein	31	14	5	24.5
F2Z5J5	Enhancer of rudimentary homolog	16	2	1	12.3
F2Z5J1	Uncharacterized protein	10	10	2	49.2
F2Z5I5	Uncharacterized protein	4	1	1	45.1
F2Z5H8	Transcription factor BTF3	15	1	1	21
F2Z5F8	Mediator of cell motility 1	6	5	2	33.7
F2Z5F2	Uncharacterized protein	23	15	2	22.5
F2Z5E2	Uncharacterized protein	40	85	19	52.4
F2Z5D4	Uncharacterized protein	13	14	6	69.5
F2Z5C7	40S ribosomal protein S3a	5	1	1	29.9
F2Z5B2	Tubulin beta chain	61	69	2	51.2
F2Z5B1	Leukocyte elastase inhibitor	31	35	11	42.5
F2Z594	High mobility group protein B1	22	22	4	24.9
F2Z558	Tyrosine 3-monooxygenase/tryptophan 5-monooxygenase activation protein zeta	44	45	6	27.7
F2Z554	Ribosomal protein L30	30	2	2	12.8
F2Z553	Eukaryotic translation initiation factor 1	34	4	2	12.7
F2Z547	cAMP-dependent protein kinase inhibitor	50	15	3	8
F2Z545	Elongin C	29	4	2	12.5
F2Z540	COP9 signalosome subunit 5	14	15	5	47
F2Z536	Dynein light chain	57	16	4	10.3
F2Z530	Ubiquitin-fold modifier-conjugating enzyme 1	19	7	3	19.4
F2Z521	Platelet-activating factor acetylhydrolase IB subunit alpha	4	3	1	46.6
F2Z505	Eukaryotic translation termination factor 1	3	1	1	49
F2Z4Z1	Tyrosine 3-monooxygenase/tryptophan 5-monooxygenase activation protein gamma	40	49	4	28.3
F2Z4Y1	Tyrosine 3-monooxygenase/tryptophan 5-monooxygenase activation protein eta	25	36	2	28.2
F2Z4Y0	Small nuclear ribonucleoprotein Sm D3	8	1	1	13.9
F2XWZ9	Glutaredoxin	51	30	6	11.8
F2Q9A3	Peptidyl-prolyl cis-trans isomerase	60	56	11	17.9
F1SVD9	Uncharacterized protein	6	1	1	26.3
F1SVB0	Capping actin protein, gelsolin like	12	6	3	38.9
F1SV59	ADP-ribosylhydrolase like 2	8	5	2	39.2
F1SV35	Aminoadipate-semialdehyde dehydrogenase-phosphopantetheinyl transferase	5	1	1	35.3
F1SV27	Four and a half LIM domains 3	32	10	7	32.1
F1SV14	Radixin	24	64	8	72.1
F1SV04	5'-nucleotidase, cytosolic IA	13	6	3	40.7
F1SUW3	EF-hand domain family member D2	4	4	1	26.6
F1SUW2	Uncharacterized protein	9	2	2	28.9
F1SUP1	Uncharacterized protein	28	18	7	40.9
F1SUG4	Uncharacterized protein	35	4	2	13.2
F1SUG3	VPS26, retromer complex component A	6	1	1	38.1
F1SUF6	Isoleucyl-tRNA synthetase	2	5	2	144.5
F1SUE3	Pyrophosphatase (inorganic) 1	39	20	8	32.8
F1SUC9	Leucine rich repeat containing 20	42	22	6	20.7
F1SUB1	Pterin-4 alpha-carbinolamine dehydratase 1	15	1	1	12
F1SU55	Synaptopodin 2 like	2	1	1	95
F1SU53	SEC24 homolog C, C	1	1	1	120.9
F1STR1	Cathepsin C	5	1	1	52
F1STK8	Chromosome 11 open reading frame 54	8	2	2	35.2
F1STC5	Uncharacterized protein	57	91	6	23.6
F1STC2	Uncharacterized protein	87	23	1	10.7
F1STC1	Ribose-5-phosphate isomerase	17	14	4	32.7
F1ST81	Drebrin like	4	2	1	48.2
F1ST73	Glyoxylate and hydroxypyruvate reductase	32	25	7	35.8
F1ST43	Acyl-CoA dehydrogenase very long chain	21	22	10	70.3
F1SSS0	Carbamoyl-phosphate synthase 1	7	8	7	153.9
F1SSL6	Proteasome subunit alpha type	32	26	8	28.4
F1SSI1	Protein phosphatase, Mg2+/Mn2+ dependent 1A	23	20	6	54.6
F1SSH8	Oxoglutarate dehydrogenase	7	9	5	117.3
F1SSH4	NudC domain containing 3	2	2	1	40.1
F1SSH3	Calcium/calmodulin dependent protein kinase II beta	8	4	1	70.8
F1SSF5	Biliverdin reductase A	15	9	4	33.5
F1SSB1	Uncharacterized protein	11	4	3	46.2
F1SS99	Prune exopolyphosphatase 1	9	10	3	49.9
F1SS77	Alpha-endosulfine	39	10	2	13.3
F1SS65	Myosin-1	13	22	1	223.1
F1SS64	Myosin-1	16	27	5	223
F1SS26	Uncharacterized protein	1	4	1	129.5
F1SS24	Fibronectin 1	0	1	1	270.4
F1SRY6	Phosphoinositide phospholipase C	7	5	4	87.5
F1SRV4	Glutathione S-transferase kappa	4	1	1	25.5
F1SRU2	Zyxin	3	1	1	62.7
F1SRN6	Neurolysin, mitochondrial	8	7	4	85.1
F1SRK6	Endoplasmin	2	4	1	55.9
F1SRI8	Myosin binding protein C, slow type	53	224	4	136.3
F1SRF1	Kelch like family member 40	13	13	7	68.5
F1SRC8	C-type lectin domain family 3 member B	45	29	8	22.2
F1SRC5	Aconitate hydratase, mitochondrial	54	141	35	85.4
F1SRB9	Uncharacterized protein	28	41	9	41.4
F1SR80	Tubulin alpha chain	47	57	0	49.3
F1SR48	Protein phosphatase 1 regulatory inhibitor subunit 1A	30	11	4	17.2
F1SR26	Myotubularin related protein 14	3	2	1	61.7
F1SR05	L-lactate dehydrogenase	41	132	14	41.4
F1SQW0	Non-specific serine/threonine protein kinase	14	9	5	58
F1SQN1	T-complex protein 1 subunit delta	18	12	7	58
F1SQL2	EGF containing fibulin extracellular matrix protein 1	5	6	2	54.8
F1SQG6	Galactokinase 2	2	1	1	50.3
F1SQE3	RNA pseudouridylate synthase domain containing 3	3	1	1	38.3
F1SQA9	SEC13 homolog, nuclear pore and C	10	2	2	35.4
F1SQ89	Cullin associated and neddylation dissociated 2 (putative)	10	17	9	134.9
F1SQ55	Uridine monophosphate synthetase	2	4	1	52.2
F1SQ46	Y-box binding protein 3	29	18	5	32.7
F1SQ14	Uncharacterized protein	38	17	3	16.5
F1SQ10	Decorin	15	10	4	39.7
F1SQ09	Uncharacterized protein	42	55	10	38.8
F1SQ01	Peroxiredoxin 4	13	11	1	30.5
F1SPY4	Uncharacterized protein	9	4	2	51.1
F1SPS7	Acylamino-acid-releasing enzyme	17	15	8	81.2
F1SPR4	Adhesion molecule with Ig like domain 3	3	1	1	43.6
F1SPM6	Glutamine--fructose-6-phosphate transaminase 1	5	4	3	78.7
F1SPJ5	SAP domain containing ribonucleoprotein	9	1	1	23.6
F1SP93	V-type proton ATPase catalytic subunit A	11	5	4	68.4
F1SP81	Phospholipase A2 activating protein	12	16	7	87.2
F1SP54	Nipsnap homolog 3B	4	1	1	28.7
F1SP32	Uncharacterized protein	42	52	10	43.1
F1SP18	Threonyl-tRNA synthetase	16	21	9	76.9
F1SNZ1	Leucine zipper transcription factor like 1	4	1	1	34.5
F1SNW8	Hexokinase-2	5	8	3	102.3
F1SNT0	Ubiquitin like modifier activating enzyme 5	3	1	1	49.4
F1SNL7	Carnosine dipeptidase 2	20	10	6	52.7
F1SNK3	S-methyl-5'-thioadenosine phosphorylase	24	16	5	31.2
F1SNJ5	Aldo-keto reductase family 1 member D1	12	3	2	37.4
F1SNH3	Caldesmon 1	6	4	2	69
F1SN71	Protein AMBP	23	22	6	39.2
F1SN68	Alpha-1-acid glycoprotein	59	89	13	23
F1SN67	Fibrillin-1	1	2	2	312.2
F1SN05	Eukaryotic translation initiation factor 3 subunit J	17	10	3	27.7
F1SMZ7	Uncharacterized protein	27	33	12	60.9
F1SMZ6	Uncharacterized protein	33	10	3	11
F1SMX5	Calcium binding protein 39	22	20	7	39.9
F1SMW9	26S proteasome non-ATPase regulatory subunit 1	13	16	9	105.7
F1SMV6	Nucleolin	3	4	2	78.2
F1SMQ4	Adenosylhomocysteinase	4	5	1	70
F1SMQ2	Tetraspanin	9	1	1	31.6
F1SMN5	Filamin C	47	269	85	290.2
F1SMJ1	Complement component C7	14	15	7	92.8
F1SMG8	3-hydroxy-3-methylglutaryl coenzyme A synthase	3	1	1	57.6
F1SMG3	Nicotinamide nucleotide transhydrogenase	6	4	4	113.8
F1SMF6	Integrin subunit alpha 1	1	1	1	128.1
F1SMC0	Adenylyl cyclase-associated protein	42	36	11	51.4
F1SMB6	Uncharacterized protein	23	3	3	20.2
F1SM93	6-pyruvoyl tetrahydrobiopterin synthase	8	2	1	16.5
F1SM75	Myomesin 1	9	28	10	174.9
F1SM07	Uncharacterized protein	30	17	4	23.2
F1SLZ3	Uncharacterized protein	42	31	9	24
F1SLX2	Alpha-2-macroglobulin	51	288	1	166.9
F1SLV6	Complement C1r	2	2	1	68.3
F1SLU6	Ubiquitin carboxyl-terminal hydrolase	21	19	12	95.8
F1SLU2	GTP binding protein 8 (putative)	7	1	1	34.5
F1SLS7	Autophagy-related protein 3	8	5	2	35.7
F1SLF4	SMYD family member 5	9	5	2	47
F1SL99	Uncharacterized protein	17	3	2	18.7
F1SL35	Uncharacterized protein	11	10	1	25.4
F1SL22	von Willebrand factor	0	1	1	321.8
F1SL07	NADH:ubiquinone oxidoreductase subunit A9	3	1	1	42.5
F1SL03	ABI family member 3 binding protein	5	3	2	93.1
F1SKZ0	TP53 induced glycolysis regulatory phosphatase	17	7	3	29.2
F1SKY2	Nitrilase family member 2	64	37	13	31.2
F1SKJ0	RBR-type E3 ubiquitin transferase	2	1	1	57.5
F1SKI5	Inosine-5'-monophosphate dehydrogenase	2	1	1	58.3
F1SKF9	Dynactin subunit 2	5	1	1	44.6
F1SKC7	Carboxypeptidase B	21	6	6	47.5
F1SK95	Uncharacterized protein	5	5	2	49.1
F1SK45	GTP:AMP phosphotransferase AK3, mitochondrial	19	4	3	25.6
F1SK00	Isocitrate dehydrogenase [NADP]	49	104	20	50.8
F1SJV8	RNA exonuclease 2	14	2	2	26.9
F1SJT2	SIK family kinase 3	2	1	1	138.9
F1SJR7	Tubulin tyrosine ligase like 12	8	9	4	67.4
F1SJR5	Protein kinase C and casein kinase substrate in neurons 2	2	1	1	55.6
F1SJJ5	60S ribosomal protein L4	8	2	2	48
F1SJC2	Protein phosphatase 1 regulatory subunit 3A	6	7	4	122.8
F1SJB5	Annexin	49	32	13	38.7
F1SJ34	Cytochrome c oxidase subunit 5A	5	1	1	16.7
F1SIX7	Twinfilin actin binding protein 2	17	8	4	39.6
F1SIX3	UTP--glucose-1-phosphate uridylyltransferase	44	93	18	55.6
F1SIV3	Uncharacterized protein	11	2	2	28.6
F1SIP0	Septin 2	12	2	2	41.5
F1SIJ9	Phosphoserine aminotransferase	15	5	4	37.6
F1SII4	Glycyl-tRNA synthetase	20	35	12	83.2
F1SII1	Uncharacterized protein	24	9	3	21.1
F1SI09	Uncharacterized protein	19	19	6	41.4
F1SHU0	3-hydroxyisobutyrate dehydrogenase	21	7	5	35.4
F1SHL9	Pyruvate kinase	71	358	3	57.8
F1SHL3	Protein transport protein SEC23	2	1	1	86.1
F1SHD6	Uncharacterized protein	43	15	5	24.8
F1SH92	Inter-alpha-trypsin inhibitor heavy chain H4	49	169	1	100.3
F1SGS9	Catalase	55	85	21	62.1
F1SGM3	Proteasome activator complex subunit 2	18	9	3	27.3
F1SGM1	Proteasome activator complex subunit 1	37	15	8	28.6
F1SGK9	Phosphodiesterase 12	6	1	1	67
F1SGH5	Uncharacterized protein	12	8	3	39.2
F1SGH0	Protein tyrosine phosphatase, receptor type G	1	1	1	148.1
F1SGG6	Keratin 5	10	25	5	63.1
F1SGF1	Proteasome 26S subunit, non-ATPase 6	6	4	2	52.2
F1SGD7	Nucleosome assembly protein 1 like 1	14	11	3	45.3
F1SG38	Thioredoxin reductase 1, cytoplasmic	10	13	4	54.7
F1SFR1	Chromosome 12 open reading frame 10	7	3	2	43.2
F1SFQ4	Poly(rC) binding protein 2	25	27	3	37.2
F1SFQ0	Uncharacterized protein	16	9	5	51.8
F1SFP9	Leiomodin 3	12	6	6	65.4
F1SFL7	tRNA nucleotidyl transferase 1	2	1	1	49.9
F1SFI7	Alpha-2-HS-glycoprotein	42	57	10	38.8
F1SFI6	Fetuin B	30	22	7	41.2
F1SFI5	Uncharacterized protein	29	52	13	61.5
F1SFI4	Kininogen 1	18	31	10	69.8
F1SF95	Peptidyl-prolyl cis-trans isomerase	8	1	1	19.2
F1SEN2	Glutamate dehydrogenase 1, mitochondrial	11	7	4	61.3
F1SEN1	Annexin	8	4	2	36.7
F1SDR7	Uncharacterized protein	37	39	4	28.1
F1SDP2	Phospholysine phosphohistidine inorganic pyrophosphate phosphatase	13	6	2	29.2
F1SDN2	Uncharacterized protein	7	6	2	51.2
F1SDJ8	Glutaredoxin 3	21	16	7	40.1
F1SDF8	Uncharacterized protein	33	3	3	14.6
F1SDF7	Uncharacterized protein	2	4	1	38.4
F1SDB6	Protein kinase AMP-activated non-catalytic subunit beta 2	7	1	1	30.3
F1SD78	Methylthioribose-1-phosphate isomerase	22	8	5	41.9
F1SD45	cAMP-dependent protein kinase catalytic subunit alpha	33	37	3	40.6
F1SCU3	Matrilin 3	2	1	1	52.7
F1SCM9	Thyroid hormone receptor interactor 10	7	4	3	68.3
F1SCF0	Alpha-1-antitrypsin	43	85	16	46.9
F1SCD0	Uncharacterized protein	37	57	8	46.6
F1SCC9	Uncharacterized protein	30	48	7	46.4
F1SCC7	Uncharacterized protein	44	72	13	45.5
F1SCC6	Uncharacterized protein	26	60	7	51.9
F1SC80	Retinol-binding protein	10	8	2	23.1
F1SC51	PDZ and LIM domain protein 1	39	20	8	36
F1SBS4	Complement C3	53	282	69	186.9
F1SBI1	Sorting nexin	2	1	1	46.8
F1SBH3	RB binding protein 9, serine hydrolase	9	2	1	21
F1SBH1	D-aminoacyl-tRNA deacylase	8	3	1	23.3
F1SB81	Plasminogen	43	86	24	91.2
F1SB63	Uncharacterized protein	16	6	6	60.6
F1SB53	Uncharacterized protein	17	9	5	48.6
F1SB42	Ezrin	19	49	6	69.3
F1SB16	COP9 signalosome subunit 3	19	18	6	45.4
F1SAX3	Sodium/potassium-transporting ATPase subunit alpha	2	1	1	113.6
F1SAP4	Tryptophanyl-tRNA synthetase	14	9	4	54.4
F1SAF0	Dihydrolipoyl dehydrogenase	23	19	8	54.2
F1SAE9	Laminin subunit beta 1	6	18	7	194.1
F1SAD1	Thiamine pyrophosphokinase	7	2	1	27.2
F1SA98	Tyrosine 3-monooxygenase/tryptophan 5-monooxygenase activation protein theta	22	27	2	27.7
F1SA96	Isoamyl acetate hydrolyzing esterase 1 (putative)	18	13	4	27.2
F1SA70	Heat shock protein family A (Hsp70) member 2	20	47	3	69
F1SA62	Uncharacterized protein	17	2	1	12.6
F1S9W8	Uncharacterized protein	2	3	1	76.1
F1S9T0	DnaJ heat shock protein family (Hsp40) member B4	21	14	6	37.8
F1S9S5	Uncharacterized protein	5	3	2	71
F1S9Q3	Uncharacterized protein	58	186	23	71.8
F1S9N9	Cystathionine gamma-lyase	4	1	1	46.1
F1S9K3	3'(2'), 5'-bisphosphate nucleotidase 1	6	6	2	35.2
F1S9H9	Low molecular weight phosphotyrosine protein phosphatase	38	16	5	18.1
F1S9B9	Serum amyloid A protein	8	1	1	13.9
F1S9B8	Serum amyloid A protein	9	1	1	13.9
F1S956	6-phosphogluconolactonase	11	7	2	27.5
F1S8Y5	Phosphoglycerate mutase	54	93	8	29.9
F1S8T6	O-GlcNAcase	1	1	1	102.9
F1S8H8	Purine nucleoside phosphorylase	19	10	4	33.6
F1S8H4	Probable tRNA N6-adenosine threonylcarbamoyltransferase	5	2	1	36.4
F1S8G6	Small glutamine rich tetratricopeptide repeat containing alpha	25	20	6	34.2
F1S8G5	Thimet oligopeptidase	17	21	9	75.7
F1S8F0	Sphingosine-1-phosphate receptor 4	2	1	1	47.6
F1S8E6	Deoxyhypusine hydroxylase	4	2	1	33
F1S8D4	WD repeat domain 77	11	3	2	37
F1S880	NSFL1 cofactor	35	30	9	40.9
F1S848	5'-nucleotidase, cytosolic II	5	2	1	65.9
F1S814	Phosphoglucomutase 1	67	192	33	61.5
F1S7W3	Uncharacterized protein	20	17	6	51.2
F1S7V6	Protein phosphatase 1 regulatory inhibitor subunit 14C	22	12	2	17.9
F1S7K4	Perilipin 4	56	71	20	158.7
F1S7K2	Leucine rich alpha-2-glycoprotein 1	27	26	9	39.4
F1S7H3	Myosin light chain kinase 2	40	72	16	66.5
F1S7A9	FGGY carbohydrate kinase domain containing	3	3	1	60.1
F1S765	Chromosome 1 open reading frame 123	38	19	5	18.1
F1S734	F-box protein 30	4	1	1	36.8
F1S710	Calcyclin binding protein	23	16	5	26.5
F1S6Q1	Uncharacterized protein	7	1	1	18.5
F1S6K5	Adenine phosphoribosyltransferase	14	4	2	19.6
F1S6B4	Proline and arginine rich end leucine rich repeat protein	18	8	6	43.7
F1S682	Sulfhydryl oxidase	10	16	5	81.4
F1S663	Uncharacterized protein	23	53	23	162.7
F1S5Z8	Synaptophysin like 2	5	4	1	30.6
F1S5Z3	Seryl-tRNA synthetase	26	31	9	58.5
F1S5N8	Uncharacterized protein	15	11	4	25.1
F1S5K0	Uncharacterized protein	26	24	5	52.4
F1S5J3	Nebulin related anchoring protein	2	2	2	196.1
F1S5H7	NHL repeat containing 2	33	37	14	79.1
F1S5F4	NIMA related kinase 7	3	1	1	37.2
F1S593	Dynamin 2	1	1	1	98
F1S574	Alpha-amylase	49	21	15	57.1
F1S564	Uncharacterized protein	13	6	3	39.2
F1S550	Dihydropyrimidine dehydrogenase [NADP(+)]	2	1	1	111.4
F1S4Z2	Charged multivesicular body protein 4B	23	3	3	25
F1S4Y8	Eukaryotic translation initiation factor 2 subunit beta	11	7	3	38.2
F1S4X9	Glutathione synthetase	10	5	4	52.3
F1S4P6	Eukaryotic translation initiation factor 3 subunit A	1	1	1	166
F1S4M2	Uncharacterized protein	5	1	1	17.4
F1S4K7	Phosphoglucomutase 2	1	1	1	69.6
F1S4J7	Uncharacterized protein	44	52	12	36.7
F1S497	Tetratricopeptide repeat domain 9	14	1	1	24.4
F1S458	Lysine--tRNA ligase	8	7	4	71.4
F1S445	Sequestosome 1	3	1	1	51.5
F1S432	DEAD-box helicase 19B	10	5	2	53.9
F1S431	Uncharacterized protein	10	14	7	105.7
F1S418	Uncharacterized protein	9	4	2	28.5
F1S415	BCL2 associated athanogene 3	36	30	15	65.2
F1S3T0	Glucosamine-6-phosphate isomerase	12	4	1	31.2
F1S3H9	Uncharacterized protein	2	10	3	186.4
F1S3H7	Uncharacterized protein	38	31	9	38.3
F1S3H1	Aldehyde dehydrogenase 6 family member A1	3	3	1	57.7
F1S340	Sorcin	6	2	1	21.7
F1S325	Putative hydroxypyruvate isomerase	4	1	1	30.2
F1S2X3	Ethylmalonyl-CoA decarboxylase 1	38	23	8	32.9
F1S2V3	HD domain containing 2	11	2	2	23.4
F1S2K3	Uncharacterized protein	69	25	5	14.5
F1S2I8	Tubulin polymerization promoting protein family member 3	24	10	3	18.9
F1S2G3	Tubulin-specific chaperone A	18	5	2	12.7
F1S2F6	Voltage-dependent anion-selective channel protein 2	13	5	2	31.6
F1S2E2	Annexin	24	30	10	53.9
F1S297	Isocitrate dehydrogenase [NAD] subunit, mitochondrial	3	1	1	41.2
F1S232	4-trimethylaminobutyraldehyde dehydrogenase	34	91	21	64.7
F1S1X9	Thioredoxin like 1	39	14	7	32.3
F1S1X3	Asparaginyl-tRNA synthetase	14	15	7	64.4
F1S1U5	Golgi reassembly stacking protein 2	7	4	2	42.6
F1S1R4	SH3 domain-binding glutamic acid-rich-like protein	20	4	2	12.8
F1S1G8	Amine oxidase	22	50	6	76.7
F1S1E7	Dihydropyrimidinase	7	7	2	56.7
F1S1B9	Uncharacterized protein	9	3	2	35.3
F1S1A9	Uncharacterized protein	10	4	1	11.1
F1S192	Prefoldin subunit 2	17	8	2	16.7
F1S182	AP complex subunit beta	2	3	1	105.6
F1S100	Serine/threonine-protein phosphatase	5	8	2	58.9
F1S0V3	Annexin	56	124	1	75.8
F1S0P0	Cytochrome c oxidase subunit 6C	9	1	1	8.6
F1S0N2	ATP-citrate synthase	16	17	14	123.6
F1S0J2	Uncharacterized protein	19	27	11	68.9
F1S0D9	Aspartyl-tRNA synthetase	27	14	10	57.1
F1S0C1	S-(hydroxymethyl)glutathione dehydrogenase	28	32	7	40.8
F1S0B9	Eukaryotic translation initiation factor 4E	20	16	4	25.1
F1RZX9	Haloacid dehalogenase like hydrolase domain containing 2	12	11	3	28.4
F1RZU4	N-acylglucosamine 2-epimerase	3	1	1	51.8
F1RZT2	Uncharacterized protein	16	2	2	14.6
F1RZR6	CutA divalent cation tolerance homolog	27	16	3	21.7
F1RZN7	Uncharacterized protein	10	9	4	72.1
F1RZ68	Inactive rhomboid protein	3	1	1	93.5
F1RZ28	Ribosomal protein S10	15	2	2	18.9
F1RYZ0	60S acidic ribosomal protein P2	56	4	3	11.7
F1RYU9	USO1 vesicle transport factor	16	18	9	104.3
F1RYS9	Uncharacterized protein	11	6	3	37.9
F1RYS8	Coiled-coil domain containing 158	1	4	1	125.4
F1RYQ0	Prolyl endopeptidase	50	101	28	84.6
F1RYI8	Uncharacterized protein	1	2	1	138.5
F1RYA4	Nucleosome assembly protein 1 like 4	17	9	4	47.3
F1RXS0	Uncharacterized protein	2	2	1	73.4
F1RXM6	Thyroxine-binding globulin	3	2	1	46.2
F1RXC2	Carbonic anhydrase 2	41	26	8	29.2
F1RXA7	Proteasome 26S subunit, non-ATPase 3	17	11	6	60.9
F1RX93	Migration and invasion enhancer 1	10	1	1	12.3
F1RX84	Pyridoxal phosphate homeostasis protein	5	2	1	30.4
F1RX66	Glutathione reductase	7	10	3	56.2
F1RX37	Fibrinogen beta chain	56	88	22	56.4
F1RX36	Fibrinogen alpha chain	33	65	17	72.6
F1RX35	Fibrinogen gamma chain	64	113	23	50.7
F1RWY0	Regucalcin	51	20	10	33.4
F1RWL6	Hypoxia inducible factor 1 subunit alpha inhibitor	5	1	1	40.4
F1RWK0	Junctophilin 1	2	1	1	71.2
F1RWJ6	Aminopeptidase	38	122	28	103.6
F1RWJ5	Importin subunit beta-1	18	33	12	97.2
F1RWI8	Secernin 2	20	16	6	48.2
F1RWC5	Kinesin-like protein	9	13	6	109.7
F1RW98	Uncharacterized protein	15	8	3	31.5
F1RVY7	Galactokinase 1	5	4	1	42.1
F1RVX2	Uncharacterized protein	27	4	2	16.1
F1RVS9	Uncharacterized protein	18	25	6	49.1
F1RVM0	O-acyl-ADP-ribose deacylase 1	8	1	1	17
F1RVL5	Uncharacterized protein	2	3	1	94.5
F1RVD2	Enolase-phosphatase E1	5	3	1	28.9
F1RVC9	Heterogeneous nuclear ribonucleoprotein D	23	19	5	38.3
F1RV28	Mitogen-activated protein kinase kinase 6	33	20	7	37.5
F1RUY9	Carnosine synthase 1	5	3	3	101.4
F1RUM4	Inter-alpha-trypsin inhibitor heavy chain H2	18	54	14	104.2
F1RUK8	Rab GDP dissociation inhibitor	65	84	18	50.3
F1RUJ0	Adenylyl cyclase-associated protein	38	25	11	53.7
F1RUH7	Uncharacterized protein	6	3	1	28.5
F1RUH0	HECT, UBA and WWE domain containing 1, E3 ubiquitin protein ligase	1	2	2	485.9
F1RUE0	Acyl-CoA thioesterase 13	9	1	1	15.2
F1RU33	Uncharacterized protein	27	2	1	10
F1RU12	Uncharacterized protein	5	2	1	32.7
F1RTY6	Peptidylprolyl isomerase D	24	7	5	40.7
F1RT87	RAB2A, member RAS oncogene family	13	5	2	23.5
F1RT25	Sorting nexin 3	20	7	3	18.8
F1RSN3	5-oxoprolinase, ATP-hydrolysing	8	14	7	136.2
F1RSM2	Proteasome 26S subunit, non-ATPase 12	6	2	2	53
F1RSG9	Uncharacterized protein	28	17	5	24.8
F1RSE1	Uncharacterized protein	15	3	3	24.8
F1RS49	ATP binding cassette subfamily E member 1	3	1	1	67.3
F1RRY2	Uncharacterized protein	7	4	2	35
F1RRJ4	Exportin 5	1	1	1	135.7
F1RRI6	EH domain binding protein 1 like 1	1	1	1	150.4
F1RRD6	Uncharacterized protein	34	63	20	84.4
F1RRC4	Chromosome 4 open reading frame 33	12	1	1	23.5
F1RR89	Uncharacterized protein	8	5	4	75.3
F1RR69	Uncharacterized protein	5	4	1	30
F1RR62	Kynurenine aminotransferase 1	7	6	2	51.4
F1RR17	Uncharacterized protein	10	3	1	23.9
F1RR06	Glycylpeptide N-tetradecanoyltransferase	4	1	1	56.8
F1RQZ4	Uncharacterized protein	9	3	2	28.1
F1RQW7	Uncharacterized protein	10	16	6	94.2
F1RQQ8	Alpha-1,4 glucan phosphorylase	65	430	4	97.2
F1RQP0	Uncharacterized protein	5	2	1	17.3
F1RQM6	Synaptosome associated protein 91	1	1	1	92.3
F1RQM4	Malic enzyme	36	51	14	63.8
F1RQ91	40S ribosomal protein S4	16	3	3	29.6
F1RQ75	Coagulation factor IX	27	19	9	51.6
F1RQ01	Fermitin family member 3	5	4	2	75.5
F1RPW9	Elongation factor 1-gamma	28	37	11	48.4
F1RPW8	Asparaginase like 1	30	17	5	32.1
F1RPV1	TOR signaling pathway regulator	28	16	5	31.4
F1RPU8	Mitochondrial pyruvate carrier	8	1	1	14.2
F1RPS8	ATP synthase subunit alpha	27	31	12	61.6
F1RPH0	Phosphoglycerate kinase	86	297	35	44.5
F1RPD2	Ubiquinol-cytochrome c reductase core protein 2	18	10	5	48.2
F1RP44	Uncharacterized protein	27	71	23	123.5
F1RP34	NAD(P)H-hydrate epimerase	30	19	5	31.5
F1RP07	Phosphorylase b kinase regulatory subunit	8	13	6	125.5
F1RP05	DnaJ heat shock protein family (Hsp40) member A2	3	2	1	45.7
F1RNX2	Programmed cell death 5	38	17	4	14.2
F1RNW4	Peptidase D	34	47	13	54.8
F1RNP2	Uncharacterized protein	34	17	7	35.7
F1RN71	Uncharacterized protein	26	12	5	28.4
F1RN41	Uncharacterized protein	4	4	2	59.2
F1RMZ8	ATPase H+ transporting V1 subunit B2	5	3	2	56.6
F1RMT5	Uncharacterized protein	10	12	6	88
F1RMR6	HSPA (Hsp70) binding protein 1	7	1	1	39.1
F1RMN7	Hemopexin	54	81	16	51.2
F1RM74	Glyceraldehyde-3-phosphate dehydrogenase	12	103	2	35.5
F1RM62	Heat shock protein family B (small) member 6	79	36	9	17.4
F1RM45	Apolipoprotein E	22	16	6	36.6
F1RM25	Serine/threonine-protein phosphatase	18	15	6	56.8
F1RM15	Leucyl-tRNA synthetase	2	2	2	130.9
F1RLB6	NSF attachment protein alpha	15	3	3	33.3
F1RL81	Hydroxysteroid 17-beta dehydrogenase 14	8	4	2	27.2
F1RL41	Beta-ureidopropionase 1	5	1	1	42.9
F1RKY2	Serpin family D member 1	31	47	11	55.8
F1RKX9	CRK like proto-oncogene, adaptor protein	15	7	3	33.8
F1RKW8	Proteasome 26S subunit, non-ATPase 11	23	19	7	47.3
F1RKJ9	Isochorismatase domain containing 1	16	10	4	32.1
F1RKI3	Histidine triad nucleotide binding protein 1	79	35	7	13.7
F1RKG8	Uncharacterized protein	79	119	16	21
F1RK61	Ubiquitin recognition factor in ER associated degradation 1	5	2	1	34.4
F1RK01	Carboxypeptidase B2	7	12	3	48.6
F1RJW7	Calsequestrin	13	5	3	45.8
F1RJS3	Bifunctional epoxide hydrolase 2	20	23	8	62.6
F1RJP8	Methionine sulfoxide reductase A	9	1	1	26.2
F1RJM2	Endoplasmic reticulum resident protein 29	6	1	1	29.2
F1RJJ3	Uncharacterized protein	22	11	5	28.7
F1RJH8	Argininosuccinate lyase	12	5	3	51.7
F1RJ93	Transgelin	42	18	6	22.4
F1RIU3	Chaperonin containing TCP1 subunit 6B	2	1	1	57.9
F1RIP4	RuvB-like helicase	3	1	1	51.1
F1RIP3	Ferritin	39	8	5	20
F1RII7	Hemoglobin subunit beta	82	477	7	16.2
F1RII5	Uncharacterized protein	47	327	1	15.6
F1RIF8	6-phosphogluconate dehydrogenase, decarboxylating	29	25	10	52.3
F1RIF3	Fumarylacetoacetate hydrolase	35	38	11	53
F1RIE2	Damage specific DNA binding protein 1	18	38	14	125.6
F1RI15	Heat shock protein family A (Hsp70) member 4	46	89	1	92.3
F1RHU4	Amine oxidase	1	1	1	64.4
F1RHU2	AKT1 substrate 1	5	1	1	27.3
F1RHN1	Transport and golgi organization 2 homolog	15	3	3	33.8
F1RHM8	RAN binding protein 1	19	7	3	23.7
F1RHJ2	Heparin binding growth factor	44	16	7	27.1
F1RHF0	Ubiquitin carboxyl-terminal hydrolase	63	63	11	26.1
F1RHE6	Potassium channel tetramerization domain containing 12	25	20	6	35.3
F1RHA7	Transforming growth factor-beta-induced protein ig-h3	18	18	9	74.3
F1RH92	Myotilin	4	8	2	55.6
F1RH19	Myosin binding protein C, fast type	44	130	41	135.2
F1RGY5	Nidogen 1	4	6	3	135.6
F1RGX4	Uncharacterized protein	78	295	7	15.2
F1RGU1	Uncharacterized protein	6	2	1	32.9
F1RGQ5	Ubiquitin conjugating enzyme E2 G1	18	6	2	19.5
F1RGP4	PBX homeobox interacting protein 1	5	4	2	80.3
F1RGN8	Smoothelin like 2	2	1	1	49
F1RGK5	Tropomyosin alpha-3 chain	39	37	3	29.3
F1RGD9	Histidyl-tRNA synthetase	6	6	3	57.3
F1RGC9	Proteasome 26S subunit, non-ATPase 13	19	12	6	42.8
F1RGC0	60S ribosomal protein L27a	7	1	1	16.6
F1RG45	Angiotensinogen	40	44	13	51.1
F1RG16	Uncharacterized protein	8	5	1	45.6
F1RFY1	Profilin	72	46	10	15
F1RFV5	Proteasome subunit beta	17	14	4	25.7
F1RFQ7	GTP-binding nuclear protein Ran	36	19	6	24.4
F1RFP8	Acetoacetyl-CoA synthetase	2	1	1	88
F1RFM7	Uncharacterized protein	8	2	1	35.2
F1RFI1	Elongation factor Tu	8	2	2	49.4
F1RFE3	Leucine carboxyl methyltransferase 1	6	8	2	37.9
F1REZ2	Versican	0	2	1	378.1
F1REW9	Density-regulated protein	30	10	4	22.1
E7EI20	Rho GDP dissociation inhibitor alpha	34	44	7	23.4
E7D6R2	Betaine homocysteine methyltransferase	36	10	6	44.9
E7BXW9	Musculoskeletal embryonic nuclear protein 1	47	20	4	8.5
E1CAJ5	Protein disulfide-isomerase	21	20	9	56.8
E0D7H7	Leukotriene A(4) hydrolase	48	76	22	69.2
E0AD19	Heart fatty acid-binding protein	75	60	10	14.7
D9D839	Superoxide dismutase [Cu-Zn]	61	60	7	15.9
D6QST6	2,4-dienoyl-CoA reductase 1	4	1	1	35.4
D5KJH8	Pancreatic colipase	13	1	1	12.1
D4P6H2	Triacylglycerol lipase	15	7	4	51.6
D3K5L3	Catechol-O-methyltransferase	44	20	9	30
D3K5K2	Peptidylprolyl isomerase	32	29	9	51.3
D3GGC5	Actinin-associated LIM protein 1a	55	53	12	39.5
D2XUP7	Cytochrome c oxidase copper chaperone	21	1	1	6.8
D2SQP3	Cysteine and glycine-rich protein 3	60	71	9	20.9
D2D3R3	Melusin	2	1	1	38
D0G7F7	Tropomyosin 4	25	32	1	28.5
D0G780	N-acetylneuraminic acid synthase	8	8	2	40.1
D0G778	Macrophage migration inhibitory factor (Fragment)	8	4	1	11.9
D0G6X4	Farnesyl diphosphate synthase	13	17	5	48.6
D0G0C9	T-complex protein 1 subunit eta	8	5	4	59.4
D0G0C8	Chaperonin containing TCP1 subunit 2	17	9	7	57.4
D0G0C5	Annexin	35	30	10	35.8
D0G0C3	Adenosylhomocysteinase	35	47	13	47.7
D0G0B3	Acetyl-Coenzyme A acyltransferase 2	27	17	7	41.9
C9W108	Non-specific serine/threonine protein kinase	2	1	1	62.3
C9E1C9	CDK9	2	1	1	42.7
C6YXH2	Cellular retinoic acid binding protein 2	18	3	2	15.7
C6L245	Putative trypsinogen	14	3	2	26.2
C5H0C6	Ubiquitin thioesterase	35	13	6	31.3
C3VVV8	Prothymosin alpha	9	3	1	12.1
C1PIG4	cAMP-dependent protein kinase regulatory subunit type II alpha	46	54	14	45.1
C0MHR2	Clathrin heavy chain	2	3	3	191.5
C0LZL0	Fascin	16	7	5	54.6
B9ZSM8	CD90 protein	9	1	1	17.9
B9TSR5	Valyl-tRNA synthetase	3	4	2	140.1
B8Y648	Ubiquitin-conjugating enzyme E2L 3	43	21	5	17.9
B8XSK0	Copine I	3	4	2	59
B8LFE3	Cardiomyopathy associated 1	2	4	3	198.7
B7SU41	Methionine adenosyltransferase 2 subunit beta	6	4	2	37.6
B6VNT8	Cardiac muscle alpha actin 1	63	151	1	42
B6EDV3	ATP synthase protein 8	15	2	1	7.9
B6E241	Growth factor receptor bound protein 2	21	10	5	25.2
B6A7R3	Carbonic anhydrase IIIb	74	150	5	20.4
B5LX40	Adaptor protein phosphotyrosine interaction PH domain and leucine zipper containing 1	16	20	8	79.4
B5KL55	CD163	3	4	2	120.6
B5KJG2	Phosphoglycerate mutase	56	168	15	28.7
B5APU8	Actin-related protein 2/3 complex subunit 3	6	3	1	20.5
B5APU7	Arp2/3 complex 34 kDa subunit	17	16	5	34.3
B5APU6	Actin-related protein 2/3 complex subunit	21	11	5	40.9
B5APU4	Actin-related protein 3-like protein	28	18	6	47.4
B5APU3	Actin-related protein 2	18	11	5	44.7
B5A562	Pentaxin	14	6	3	24.9
B3VMR0	5-aminoimidazole-4-carboxamide ribonucleotide formyltransferase/IMP cyclohydrolase	11	4	4	64.4
B3VMQ9	Adenylosuccinate lyase	30	28	10	55
B3VI70	Troponin I	37	26	5	21.3
B3STX9	Prothrombin	42	77	20	69.9
B3CL06	Transferrin	70	403	53	78.9
B2ZF49	Hydroxyacyl-coenzyme A dehydrogenase/3-ketoacyl-coenzyme A thiolase/enoyl-coenzyme A hydratase alpha subunit	3	2	2	83.2
B2CZR7	CFL2b variant 1	64	60	10	18.7
B1Q0K1	Tubulin polymerization promoting protein	6	1	1	24
B1Q039	CRYAB	49	39	8	20.1
B1PMB0	Liver fatty acid binding protein	33	4	1	14.1
B1A8Z3	Alpha-1,4 glucan phosphorylase	25	45	12	97.4
B1A3A0	Beta-enolase 3 transcript variant 1	68	398	22	47.1
B0LXK8	Hypoxanthine phosphoribosyltransferase	39	22	7	24.5
B0LFE9	Complement component 4	34	128	1	192.4
A9X3T3	Peroxisomal D3,D2-enoyl-CoA isomerase	8	2	2	43.3
A8U4R4	Transketolase	27	47	11	67.8
A8R080	L-selectin	3	2	1	42
A7YX24	Gamma-synuclein	20	2	2	13
A7XXV9	NAD-dependent protein deacylase sirtuin-5, mitochondrial	14	4	3	33.6
A7TX82	COP9 constitutive photomorphogenic-like subunit 2	15	13	5	51.6
A7E1S9	Uncharacterized protein (Fragment)	62	144	3	22.9
A6XAC5	Serine/threonine-protein phosphatase 2A 56 kDa regulatory subunit	2	1	1	56.3
A6NA29	AMP deaminase	16	12	7	86.5
A6M929	Eukaryotic translation initiation factor 4A isoform 2	36	46	13	46.4
A5YV76	Fatty acid synthase	36	102	4	272.1
A5PF00	B-factor, properdin	33	79	22	85.8
A5GHK3	Prefoldin subunit 4	20	4	2	15.3
A5GFT5	Aminopeptidase-like 1	7	6	3	55.6
A5A8W8	Complement component 4A	35	133	3	192.3
A5A8W4	Tenascin XB	7	18	9	446.8
A5A759	Keratin 2A	7	17	4	65.8
A5A758	Keratin 1 (Fragment)	11	26	6	65.2
A4UXY9	Nucleoside diphosphate kinase	60	32	6	17.2
A4UTN7	Heat shock 105kDa/110kDa protein 1	12	12	7	96.6
A4GR69	Telethonin	7	1	1	18.9
A3RG87	Cystatin B protein	46	25	3	11.1
A2IBS6	Sara2 protein	6	2	1	22.4
A1XQV6	COX7A2	16	1	1	9.2
A1XQV5	Fast skeletal muscle troponin C	33	13	4	18.1
A1XQU8	RPS6 (Fragment)	5	1	1	27.5
A1XQT5	HUMMLC2B	34	5	5	19
A0ZVR1	Mitochondrial antiviral signaling protein	11	5	3	55.1
A0SEH2	Complement component C8B	8	7	4	69.1
A0SEH1	Complement component C8A	16	17	6	66
A0SEH0	Complement component C6	1	3	1	105.2
A0PFK6	F-actin-capping protein subunit alpha	37	13	6	33
A0PFK5	F-actin-capping protein subunit alpha	5	2	1	33
A0PA01	Serine protease inhibitor 9	9	5	2	42.5
A0PA00	C1 inhibitor	10	15	4	54.6
A0MWC5	Monocyte differentiation antigen CD14	14	17	4	39.8
A0A2C9F3E2	Troponin T, slow skeletal muscle	19	23	3	31.2
A0A2C9F3D9	Vimentin	5	2	2	49.2
A0A2C9F3C5	Aspartoacylase	4	3	1	42.5
A0A2C9F3C3	Hydroxyacyl-coenzyme A dehydrogenase, mitochondrial	40	33	9	31.3
A0A2C9F3B1	Aldehyde dehydrogenase, mitochondrial	19	19	6	59.3
A0A2C9F3A4	UMP-CMP kinase	39	27	7	26
A0A2C9F3A3	ATP synthase subunit	15	4	2	23.4
A0A2C9F397	Triokinase/FMN cyclase	17	12	7	59.1
A0A2C9F393	Vinculin	38	107	3	121.7
A0A2C9F386	COP9 signalosome complex subunit 4	35	22	9	40.8
A0A2C9F382	Fatty acid-binding protein, liver	37	7	2	16.5
A0A2C9F380	Phosphoacetylglucosamine mutase	18	35	9	59.3
A0A2C9F366	Heat shock protein beta-1	62	45	13	25.5
A0A2C9F356	Haptoglobin	56	101	19	38.4
A0A2C9F352	Dehydrogenase/reductase SDR family member 4	4	1	1	26.3
A0A2C9F350	Medium-chain-specific acyl-CoA dehydrogenase, mitochondrial	15	6	5	43.3
A0A2C9F348	Spliceosome RNA helicase DDX39B	9	8	4	59
A0A2C9F331	Myosin light polypeptide 6	34	19	4	17.9
A0A288CG47	Proteasome 26S subunit, non-ATPase 4	16	7	4	41.1
A0A288CG11	SH3 domain containing GRB2 like, endophilin B1	7	3	2	45
A0A288CFV1	Uncharacterized protein	20	3	1	16.8
A0A288CFT0	Triosephosphate isomerase	76	264	19	30.5
A0A287BTN9	Proteasome 26S subunit, non-ATPase 10	4	4	1	24.5
A0A287BSZ9	Dynein cytoplasmic 1 light intermediate chain 2	3	2	1	54.1
A0A287BSR0	Desmin	3	2	1	54.1
A0A287BSQ1	Developmentally regulated GTP binding protein 2	3	1	1	40.6
A0A287BSL7	Uncharacterized protein	49	19	3	17.4
A0A287BSL4	Vinculin	44	100	1	101
A0A287BSE8	G protein pathway suppressor 1	19	17	7	59.2
A0A287BSA8	Ribosomal protein	6	1	1	24.8
A0A287BRL8	Myristoylated alanine rich protein kinase C substrate	26	18	4	31.6
A0A287BRF1	Uncharacterized protein	15	10	3	20.4
A0A287BRD8	BCL2 associated athanogene 5	3	1	1	52.6
A0A287BRC2	Uncharacterized protein	8	4	1	18.5
A0A287BRA4	Uncharacterized protein	7	3	1	16.8
A0A287BR93	Structural maintenance of chromosomes protein	1	2	1	145
A0A287BQU9	Uncharacterized protein	48	130	22	74
A0A287BQT2	Aconitase 1	31	64	22	98.2
A0A287BQI3	Myosin binding protein C, slow type	50	178	1	118.6
A0A287BQ72	Transaldolase	17	21	6	43
A0A287BQ14	PDGFA associated protein 1	27	10	4	20.7
A0A287BPV4	Centlein	1	1	1	161.8
A0A287BPT5	Sulfurtransferase	17	3	3	38.8
A0A287BPP9	Proteasome subunit beta	23	10	4	26.3
A0A287BPN5	Urocanate hydratase 1	2	1	1	74.2
A0A287BPN0	Microtubule-associated protein	29	116	1	238.7
A0A287BPK4	Myozenin 3	3	4	1	26.4
A0A287BPI2	Ribosome binding protein 1	2	5	3	163.2
A0A287BPC6	FUS RNA binding protein	4	5	2	53
A0A287BPB7	Serine/threonine-protein phosphatase 2A 55 kDa regulatory subunit B	21	17	8	53
A0A287BP37	Arginyl-tRNA--protein transferase 1	2	2	1	64.6
A0A287BNU5	RAB5B, member RAS oncogene family	16	9	1	23.7
A0A287BNK4	Signal transducer and activator of transcription	8	9	5	91.8
A0A287BNF7	Complement C1q subcomponent subunit A	9	4	1	28.6
A0A287BNE4	Ubiquitin conjugating enzyme E2 M	15	8	2	20.9
A0A287BN68	Glutamate ionotropic receptor NMDA type subunit 2A	1	1	1	152.3
A0A287BN36	Uncharacterized protein	17	7	1	23.5
A0A287BN18	Nebulin	1	2	2	654.5
A0A287BMB7	Tubulin alpha chain	39	34	4	50
A0A287BMB6	Heterogeneous nuclear ribonucleoprotein A/B	19	17	4	37
A0A287BM79	Cold shock domain containing E1	1	1	1	93.7
A0A287BM29	Apolipoprotein A-IV	33	18	11	44.8
A0A287BLV7	NADH:ubiquinone oxidoreductase core subunit S1	2	1	1	79.5
A0A287BLQ0	Uncharacterized protein	41	34	11	38.3
A0A287BLM6	Mitogen-activated protein kinase	6	7	2	43
A0A287BLB5	Uncharacterized protein	9	1	1	19
A0A287BLB3	KH-type splicing regulatory protein	5	3	2	76.8
A0A287BL80	Mannose-6-phosphate isomerase	44	55	14	46.4
A0A287BL75	Troponin T, fast skeletal muscle	23	31	2	31.6
A0A287BL05	Heterogeneous nuclear ribonucleoprotein H1	7	5	1	51.2
A0A287BKC6	Heart and neural crest derivatives expressed 2	3	3	1	23.7
A0A287BK75	Uncharacterized protein	17	18	4	43.4
A0A287BJZ2	Ubiquitin protein ligase E3A	2	1	1	100.5
A0A287BJV2	Spectrin beta chain	1	1	1	274.3
A0A287BJT6	SP110 nuclear body protein	2	2	1	80.9
A0A287BJS1	Uncharacterized protein	4	1	1	70.9
A0A287BJR8	Acyl-CoA-binding protein	79	49	6	8
A0A287BJQ6	Serine/threonine-protein phosphatase 2A 56 kDa regulatory subunit	2	1	1	69.9
A0A287BJQ2	NADH:ubiquinone oxidoreductase core subunit S8	5	2	1	27.1
A0A287BJ85	Immunity related GTPase Q	6	7	2	60.9
A0A287BIV4	Proteasome subunit alpha type	29	20	6	29.5
A0A287BIN1	Apolipoprotein B mRNA editing enzyme catalytic subunit 2	55	58	10	25.8
A0A287BIL8	Endoplasmic reticulum chaperone BiP	23	28	10	72.2
A0A287BI30	Uncharacterized protein	39	37	8	25.9
A0A287BHS8	Mitogen-activated protein kinase	11	9	3	41.5
A0A287BHQ5	Dishevelled binding antagonist of beta catenin 1	1	1	1	86.3
A0A287BHP7	Ubiquinol-cytochrome c reductase core protein 1	20	11	7	58.6
A0A287BHL2	Phosphoglycolate phosphatase	43	41	10	34.3
A0A287BHA2	Phosphoribosyl pyrophosphate synthetase 1-like 1	4	4	1	34.7
A0A287BH90	Uncharacterized protein	7	9	4	65.2
A0A287BH89	Uncharacterized protein	43	72	2	12.8
A0A287BH49	Chloride intracellular channel protein	27	22	7	46.6
A0A287BGW4	Delta-aminolevulinic acid dehydratase	41	31	10	34.7
A0A287BGP7	Uncharacterized protein	3	4	1	45
A0A287BG40	Uncharacterized protein	9	4	2	27.4
A0A287BG25	Troponin I1, slow skeletal type	32	30	9	24.8
A0A287BG23	Glyceraldehyde-3-phosphate dehydrogenase	65	637	16	42.5
A0A287BG14	Proteasome 26S subunit, ATPase 6	12	7	4	45.8
A0A287BFU6	Complement C1r	2	3	1	70.8
A0A287BF94	Cathepsin B	7	2	2	40.5
A0A287BF33	Actin, alpha skeletal muscle	67	157	2	38
A0A287BF30	Uncharacterized protein	20	16	6	45.2
A0A287BEZ5	Acyl-CoA synthetase short chain family member 2	10	9	5	80.2
A0A287BEJ8	Dystrobrevin	2	2	1	81.4
A0A287BEH6	PDZ and LIM domain 7	4	4	2	55.3
A0A287BEE7	EEF1A lysine methyltransferase 1	7	1	1	24.2
A0A287BE48	Plexin domain containing 2	5	5	2	62.4
A0A287BDV3	Uncharacterized protein	27	9	1	13.9
A0A287BDU7	Uncharacterized protein	38	191	2	154.2
A0A287BDN4	N(alpha)-acetyltransferase 16, NatA auxiliary subunit	1	1	1	102.7
A0A287BDL6	Tropomyosin alpha-3 chain	45	40	4	32.8
A0A287BD91	CAP-Gly domain containing linker protein 1	9	16	9	157.3
A0A287BD00	Ras-related protein Rab-1A	33	14	1	24.4
A0A287BCG9	Uncharacterized protein	28	23	6	19.2
A0A287BCD5	Transmembrane channel-like protein	1	1	1	90.6
A0A287BC96	Formin homology 2 domain containing 1	9	5	5	108.5
A0A287BBS8	Insulin degrading enzyme	1	2	1	117.9
A0A287BBB5	VAMP associated protein A	13	5	2	32.2
A0A287BB89	Pyridoxamine 5'-phosphate oxidase	23	12	4	30.1
A0A287BB72	Serine/threonine-protein phosphatase 2A 65 kDa regulatory subunit A alpha isoform	25	49	15	78
A0A287BAZ6	Peroxiredoxin 2	56	60	11	21.9
A0A287BAY9	Serum albumin	77	1048	64	74.5
A0A287BAM0	Dystroglycan	7	6	4	97.2
A0A287BAF3	Adenylosuccinate synthetase isozyme 1	57	75	21	50.2
A0A287BAB5	Uncharacterized protein	10	2	1	10.1
A0A287BA50	Succinate--CoA ligase [ADP/GDP-forming] subunit alpha, mitochondrial	18	12	4	36.1
A0A287BA12	Vacuolar protein sorting 4 homolog B	3	2	1	49.4
A0A287B9Z6	Uncharacterized protein	45	35	8	31.5
A0A287B9Y7	Inosine triphosphate pyrophosphatase	12	3	2	23
A0A287B9W3	Dynein cytoplasmic 1 heavy chain 1	1	7	4	428.1
A0A287B9G2	3-hydroxyisobutyryl-CoA hydrolase, mitochondrial	8	2	2	43.2
A0A287B9B3	Serpin family F member 2	15	12	5	62.4
A0A287B975	CCHC-type zinc finger nucleic acid binding protein	32	12	4	19.5
A0A287B959	Histone H2A	19	10	2	15.8
A0A287B8Z2	Fructose-bisphosphate aldolase	46	97	12	46.8
A0A287B8R2	Uncharacterized protein	17	11	5	46.7
A0A287B8G2	Solute carrier family 38 member 5	5	1	1	54
A0A287B8G0	Pyruvate kinase	66	431	4	63.1
A0A287B8D3	Nicotinamide phosphoribosyltransferase	3	1	1	58.8
A0A287B826	Mitogen-activated protein kinase	11	9	3	43.9
A0A287B800	Uncharacterized protein	47	152	1	3.6
A0A287B7R3	Prostaglandin reductase 1	25	6	6	35.7
A0A287B7Q3	Uncharacterized protein	32	10	1	19.1
A0A287B7N9	Glycerophosphocholine phosphodiesterase 1	1	1	1	75.9
A0A287B7B9	Beta-2-microglobulin	9	2	1	15.7
A0A287B799	Rab GDP dissociation inhibitor	31	34	6	51.6
A0A287B6W8	Apoptotic chromatin condensation inducer 1	1	1	1	145.9
A0A287B6V8	Mitogen-activated protein kinase kinase kinase 20	9	5	3	52.1
A0A287B6S5	Enolase 1	61	185	1	47.4
A0A287B6J6	Heat shock protein family A (Hsp70) member 4	43	90	2	95.4
A0A287B5Z7	Acyl-CoA thioesterase 4	11	12	3	55
A0A287B5Y6	Uncharacterized protein	4	4	2	53.2
A0A287B5W2	Uncharacterized protein	49	55	8	25.9
A0A287B5V2	Joining chain of multimeric IgA and IgM	31	11	4	19.7
A0A287B5Q7	Uncharacterized protein	2	2	1	39.7
A0A287B5N7	Tropomyosin alpha-1 chain	19	37	2	44.1
A0A287B5L2	Propionyl-CoA carboxylase subunit alpha	2	1	1	80.1
A0A287B5J2	Myosin binding protein C, slow type	53	211	1	134.1
A0A287B4T1	NAD-dependent protein deacetylase	6	1	1	43.4
A0A287B4P8	Proteasome 26S subunit, ATPase 4	5	7	2	47.3
A0A287B4G4	Rac family small GTPase 1	31	24	4	21.4
A0A287B4F9	Uncharacterized protein	6	8	4	101.6
A0A287B4E6	Translationally-controlled tumor protein	50	36	8	27.9
A0A287B441	ATP synthase-coupling factor 6, mitochondrial	22	1	1	12.4
A0A287B3W7	Uncharacterized protein	45	23	2	10.7
A0A287B3S3	Inter-alpha-trypsin inhibitor heavy chain H1	23	53	17	103
A0A287B3S0	Uncharacterized protein	17	4	1	11.1
A0A287B3F4	Amylo-alpha-1, 6-glucosidase, 4-alpha-glucanotransferase	56	286	69	175.3
A0A287B391	Uncharacterized protein	8	4	1	18.6
A0A287B356	Eukaryotic translation initiation factor 5A	40	26	6	16.8
A0A287B2M3	40S ribosomal protein SA	21	3	3	30.7
A0A287B2M0	Uncharacterized protein	9	2	2	36.1
A0A287B2G7	Uncharacterized protein	3	9	4	117.6
A0A287B2F5	Uncharacterized protein	18	15	1	19.4
A0A287B2B4	Importin 7	7	8	5	122.8
A0A287B250	Chloride intracellular channel protein	30	9	5	27.6
A0A287B247	Chromosome 5 open reading frame 51	5	1	1	33.5
A0A287B231	Ubiquilin 1	9	5	2	62.5
A0A287B207	Ubiquitin conjugating enzyme E2 R2	5	1	1	27.1
A0A287B1V1	Acyl-CoA dehydrogenase short/branched chain	3	1	1	47.2
A0A287B1U8	SET and MYND domain containing 1	19	8	6	56.6
A0A287B1T7	Dimethylarginine dimethylaminohydrolase 1	37	25	8	34.8
A0A287B1Q0	Protein disulfide-isomerase	4	3	2	73.3
A0A287B186	Vesicle-associated membrane protein-associated protein B	15	5	2	27
A0A287B175	Uncharacterized protein	23	11	1	9.2
A0A287B0P4	Tumor protein D52 like 2	6	1	1	24.4
A0A287B0N7	Nucleolar protein 3	27	5	3	25.8
A0A287B0I3	Uncharacterized protein	31	16	3	22.8
A0A287B0D1	Uncharacterized protein	12	22	10	103.5
A0A287B088	Proteasome subunit beta	39	22	7	29
A0A287AZK2	Transgelin	30	23	6	26.7
A0A287AZJ9	NEDD8-activating enzyme E1 regulatory subunit	16	13	6	60.3
A0A287AZF9	Cytochrome c1	4	1	1	35.4
A0A287AZD8	BCL2 like 13	16	7	4	49.9
A0A287AZB0	Kynurenine aminotransferase 3	21	29	9	50.6
A0A287AZA7	Uncharacterized protein	35	41	7	18
A0A287AZ99	Uncharacterized protein	51	68	7	28.6
A0A287AZ22	Target of myb1 membrane trafficking protein	12	4	3	55.9
A0A287AZ17	Hydroxyacylglutathione hydrolase	30	24	7	39
A0A287AYY7	Leucine rich repeat containing 47	5	6	2	63.9
A0A287AYW3	Poly(U) binding splicing factor 60	3	1	1	62.9
A0A287AYR8	Uncharacterized protein	51	53	10	30.8
A0A287AYJ0	Dihydropyrimidinase like 3	34	42	10	57.7
A0A287AYH2	GMP reductase	21	14	5	37.7
A0A287AY73	Myozenin-1	21	4	2	33.1
A0A287AY64	GLI pathogenesis related 2	17	5	2	17.2
A0A287AY54	60S acidic ribosomal protein P0	24	4	3	29.8
A0A287AY47	RAN guanine nucleotide release factor	7	1	1	20.2
A0A287AY28	Uncharacterized protein	6	5	2	68.3
A0A287AY26	Vesicle trafficking 1	14	4	2	33.8
A0A287AXX0	Adenosine kinase	6	2	2	40.5
A0A287AXS4	Uncharacterized protein	26	6	2	16.7
A0A287AXJ7	Inositol-3-phosphate synthase 1	3	1	1	60.7
A0A287AX98	Coagulation factor XII	8	11	5	71.2
A0A287AX77	Uncharacterized protein	59	11	5	22.6
A0A287AWV5	Laminin subunit beta 2	3	6	3	204.8
A0A287AWT8	Sestrin 1	6	2	2	63.8
A0A287AWR7	Paraoxonase 1	9	10	3	40
A0A287AWQ5	Uncharacterized protein	26	5	2	17
A0A287AVV2	Voltage-dependent anion-selective channel protein 1	21	5	4	32.1
A0A287AUT0	Uncharacterized protein	25	52	15	67.5
A0A287AUQ9	A-kinase anchoring protein 12	6	9	5	177
A0A287AUH9	Synaptopodin 2	4	4	2	135.6
A0A287ATP0	Heparan sulfate proteoglycan 2	5	21	13	462.6
A0A287ATH4	Glypican 1	3	1	1	61.3
A0A287ATD7	26S proteasome regulatory subunit 8	13	8	3	45.6
A0A287ATD3	Importin subunit alpha	3	1	1	57.8
A0A287ATD0	Keratin 75	5	11	2	58.7
A0A287AT21	Sorbitol dehydrogenase	47	43	11	38
A0A287AT18	Proteasome subunit alpha type	34	18	6	27.9
A0A287ASX4	Vasodilator stimulated phosphoprotein	7	3	1	40
A0A287ASW4	Uncharacterized protein	22	8	2	14.4
A0A287ASQ7	Zinc finger and BTB domain containing 8 opposite strand	6	4	1	19.5
A0A287ASH3	NGG1 interacting factor 3 like 1	3	2	1	49
A0A287ASD0	60S ribosomal protein L5	11	2	2	34.3
A0A287AS29	Nucleoside diphosphate kinase	32	18	2	17.1
A0A287ARU7	Uncharacterized protein	65	65	16	27.4
A0A287ARU4	S-phase kinase associated protein 1	30	9	3	18.6
A0A287ARR1	Ferritin	63	40	10	21.2
A0A287ARG2	Uncharacterized protein	18	9	2	15.3
A0A287ARD6	Uncharacterized protein	29	58	1	14.7
A0A287ARC8	Serine/threonine-protein phosphatase 2A activator	27	19	7	41.4
A0A287ARC6	RAD23 homolog A, nucleotide excision repair protein	6	10	1	45.6
A0A287AR55	Fumarate hydratase, mitochondrial	37	35	12	54.7
A0A287AR48	Succinate--CoA ligase [ADP-forming] subunit beta, mitochondrial	7	7	2	50.3
A0A287AR05	Succinate-semialdehyde dehydrogenase	7	3	3	57.4
A0A287AQK7	Heat shock protein HSP 90-alpha	53	187	25	90.6
A0A287AQF2	Cofilin-1	59	25	7	18
A0A287AQB6	Tyrosine-protein phosphatase non-receptor type	6	9	3	68
A0A287AQ97	Armadillo repeat containing X-linked 4	1	1	1	275.3
A0A287AQ25	Calpain-3	6	5	3	94.5
A0A287AQ20	Uncharacterized protein	21	31	9	65.3
A0A287AQ12	Protein kinase C and casein kinase substrate in neurons 3	2	1	1	52.1
A0A287APX6	RAP1B, member of RAS oncogene family	18	8	1	20.8
A0A287APW0	EWS RNA binding protein 1	2	2	1	76.8
A0A287APP9	HBS1 like translational GTPase	5	2	2	74.4
A0A287APK5	Calcium-transporting ATPase	17	34	9	110
A0A287APJ0	NudC domain containing 2	7	2	1	17.6
A0A287AP73	Inter-alpha-trypsin inhibitor heavy chain 3	1	2	1	99.2
A0A287AP52	F-actin-capping protein subunit beta	36	33	9	34.4
A0A287ANV7	Lymphocyte cytosolic protein 1	45	76	17	71.2
A0A287ANM8	Uncharacterized protein	18	5	5	28.8
A0A287ANL1	Calcium voltage-gated channel auxiliary subunit beta 2	2	1	1	73
A0A287ANE3	Myomesin 3	1	1	1	164.9
A0A287AN33	Tropomyosin 2	45	57	5	32.8
A0A287AN02	26S proteasome non-ATPase regulatory subunit 2	16	24	10	100.2
A0A287AMZ2	T-complex protein 1 subunit gamma	17	10	7	60.6
A0A287AMP3	Creatine kinase M-type	63	565	16	40.4
A0A287AMJ4	Selenoprotein W	19	4	1	7
A0A287AMG7	Bridging integrator 1	40	115	21	62.7
A0A287AM26	Arginyl aminopeptidase	3	3	2	72.1
A0A287ALS7	Uncharacterized protein	39	13	2	12.5
A0A287ALP4	Uncharacterized protein	9	8	4	79.2
A0A287ALN1	Nidogen 2	1	1	1	152.8
A0A287ALM0	Aspartyl aminopeptidase	13	11	5	59.1
A0A287ALL0	Platelet activating factor acetylhydrolase 1b catalytic subunit 2	12	6	2	25.6
A0A287ALJ6	Uncharacterized protein	40	29	2	17.1
A0A287ALJ2	Parvalbumin	6	1	1	15.2
A0A287ALC1	Uncharacterized protein	50	105	20	65
A0A287ALA0	Uncharacterized protein	18	7	3	23.1
A0A287AL89	Fibulin-1	2	1	1	89.3
A0A287AL59	Phosphate cytidylyltransferase 2, ethanolamine	9	4	3	45.6
A0A287AL55	Alpha-1,4 glucan phosphorylase	14	28	2	96.2
A0A287AKY1	cAMP-dependent protein kinase type I-alpha regulatory subunit	30	41	12	42.9
A0A287AKT7	Protein arginine N-methyltransferase 5	11	11	5	76.2
A0A287AKC0	Ribosomal protein S5	6	2	1	26.8
A0A287AK42	Phosducin like 3	6	1	1	27.4
A0A287AK19	Moesin	31	74	13	67.9
A0A287AJU1	Coactosin like F-actin binding protein 1	16	9	3	16
A0A287AJT7	Uncharacterized protein	8	1	1	15.7
A0A287AJN3	Chromosome 20 open reading frame 27	19	4	2	19.4
A0A287AJM0	Golgi associated, gamma adaptin ear containing, ARF binding protein 1	3	2	1	69.9
A0A287AJ97	Farnesyltransferase, CAAX box, alpha	8	4	2	43.2
A0A287AIU7	Troponin C, slow skeletal and cardiac muscles	8	10	2	20.8
A0A287AIQ8	ATPase H+ transporting V1 subunit E1	6	1	1	26.1
A0A287AIN9	Septin 11	9	11	2	50.9
A0A287AIM8	Complement C5a anaphylatoxin	7	17	9	188.5
A0A287AIJ3	Glutathione peroxidase	4	2	1	25.7
A0A287AII8	1,4-alpha-glucan branching enzyme 1	34	68	20	80.8
A0A287AIE6	ATPase ASNA1	12	10	3	38.8
A0A287AIE4	Kelch like family member 41	35	70	21	68.1
A0A287AI92	Carbonic anhydrase 1	62	47	11	29
A0A287AI67	Uncharacterized protein	5	4	2	47.8
A0A287AHU1	Poly(A) binding protein interacting protein 1	3	2	1	45.8
A0A287AHQ0	Acetyl-CoA acetyltransferase 2	13	3	3	41.3
A0A287AHI7	Uncharacterized protein	23	18	5	31
A0A287AHC2	Glucosamine-6-phosphate isomerase	9	4	1	35
A0A287AHC1	Uncharacterized protein	25	3	1	10
A0A287AH85	Adenylate kinase 2, mitochondrial	24	12	4	25.6
A0A287AH70	Tetratricopeptide repeat domain 38	17	15	6	54.8
A0A287AH49	Muscular LMNA interacting protein	2	1	1	104.4
A0A287AH11	Uncharacterized protein	13	2	1	12.5
A0A287AGT7	Sorting nexin	4	1	1	46.6
A0A287AGT0	Uncharacterized protein	23	4	4	30.7
A0A287AGG3	Proteasome subunit beta	28	21	7	30.1
A0A287AGA0	Microfibril associated protein 5	7	4	1	19
A0A287AG29	Calreticulin	19	7	4	44.2
A0A287AG25	Tumor protein D52	6	3	1	25.9
A0A287AG13	Apolipoprotein B	6	33	22	516.9
A0A287AFZ8	Cysteine and histidine-rich domain-containing protein 1	22	15	5	37.3
A0A287AFT5	Collagen type XV alpha 1 chain	1	1	1	135.6
A0A287AFQ4	Complement C8 gamma chain	30	8	5	25
A0A287AFJ9	Gephyrin	4	2	2	87
A0A287AFG3	Uncharacterized protein	4	1	1	38.3
A0A287AFF5	Peptidyl-prolyl cis-trans isomerase	19	2	2	18.2
A0A287AFE3	Uncharacterized protein	13	12	2	22.6
A0A287AF76	Eukaryotic translation initiation factor 4 gamma 3	5	13	5	183.4
A0A287AEY9	Uncharacterized protein	6	10	2	28.9
A0A287AEP6	Chromosome 11 open reading frame 58	9	3	1	20.2
A0A287AEL2	Keratin 14	14	27	6	56
A0A287AEH0	Proteasome 26S subunit, non-ATPase 7	7	3	2	37
A0A287AEC1	Deoxycytidine kinase	11	5	2	25.1
A0A287AEC0	Basic leucine zipper and W2 domains 2	25	30	9	48.1
A0A287AE99	Small nuclear ribonucleoprotein-associated protein	3	4	1	27.1
A0A287AE63	Neural precursor cell expressed, developmentally down-regulated 8	20	3	1	8
A0A287AE58	Uncharacterized protein	11	11	4	60.5
A0A287AE42	Enoyl-CoA hydratase 1	6	1	1	40
A0A287AE39	Ring finger protein 214	2	1	1	77.6
A0A287ADK8	Tubulin alpha chain	47	58	1	50.1
A0A287ADK7	Mitochondrial fission 1 protein	9	3	1	16.8
A0A287ADJ2	Heat shock protein family A (Hsp70) member 9	28	30	13	73.6
A0A287ADH9	Chloride intracellular channel protein	25	9	4	28.7
A0A287ADE6	Ribosomal protein S15a	13	2	2	14.8
A0A287AD53	Fermitin family member 2	8	8	4	87.2
A0A287AD49	Microtubule associated protein RP/EB family member 2	6	2	1	37
A0A287AD21	Small ubiquitin-related modifier	12	1	1	11.8
A0A287ACW6	Ubiquitin specific peptidase 9 X-linked	1	10	2	290.7
A0A287ACN2	Uncharacterized protein	19	6	1	7.8
A0A287ACI6	Uncharacterized protein	19	2	2	19.3
A0A287AC69	Proliferation and apoptosis adaptor protein 15	38	8	4	15
A0A287AC34	Talin 1	18	73	31	271.3
A0A287ABS5	Ubiquitin specific peptidase 47	2	2	2	153.7
A0A287ABK3	Uncharacterized protein	11	4	1	15.1
A0A287ABJ0	Uncharacterized protein	15	5	2	41.2
A0A287AB80	Ubiquitin conjugating enzyme E2 H	8	1	1	20.6
A0A287AB66	COP9 signalosome complex subunit 6	14	12	4	36.2
A0A287AB58	Ubiquitin-like modifier	5	1	1	18.6
A0A287AB52	Microfibril associated protein 4	9	6	2	28.8
A0A287AB49	Diphosphomevalonate decarboxylase	4	1	1	43.3
A0A287AB01	TRK-fused gene	2	2	1	43.4
A0A287AAX2	Pleckstrin homology domain containing A1	3	1	1	45.1
A0A287AAP0	Uncharacterized protein	20	14	4	34.3
A0A287AAM4	BRO1 domain and CAAX motif containing	5	2	1	46.3
A0A287AAG0	UDP-N-acetylglucosamine pyrophosphorylase 1 like 1	7	7	3	55.9
A0A287AAE2	Dihydropteridine reductase	41	18	7	25
A0A287AA47	Glutamate-cysteine ligase modifier subunit	24	13	5	30.5
A0A287AA45	Uncharacterized protein	5	2	1	33.5
A0A287AA42	Uncharacterized protein	12	9	1	15.7
A0A287AA30	Actinin alpha 4	3	2	2	117
A0A287AA21	Uncharacterized protein	27	17	5	31.2
A0A287A9Y6	40S ribosomal protein S7	6	1	1	22.1
A0A287A9W3	Uncharacterized protein	7	1	1	15.6
A0A287A9I8	ATP synthase subunit gamma	4	1	1	33
A0A287A9G4	Argininosuccinate synthase 1	19	8	6	46.5
A0A287A996	Taxilin beta	18	13	7	75.7
A0A287A995	Glutathione S-transferase	20	4	3	25.5
A0A287A8Y8	Short-chain-specific acyl-CoA dehydrogenase, mitochondrial	6	2	2	44.7
A0A287A8V0	Uncharacterized protein	30	55	1	14
A0A287A8T0	Uncharacterized protein	18	3	3	29.4
A0A287A8Q6	40S ribosomal protein S27	15	1	1	9.6
A0A287A837	Leucine zipper and CTNNBIP1 domain containing	6	1	1	20.2
A0A287A808	Cytochrome c oxidase subunit	13	1	1	10.2
A0A287A7X7	Pyroglutamyl-peptidase I	18	3	2	26.9
A0A287A7R5	IQ motif containing GTPase activating protein 1	14	34	17	195.2
A0A287A7P5	Uncharacterized protein	2	1	1	57.9
A0A287A7K4	Ribokinase	7	5	2	34.4
A0A287A7H7	Uncharacterized protein	11	3	2	26.5
A0A287A7G8	Histone H2B	23	8	3	16.7
A0A287A7E4	Uncharacterized protein	16	1	1	13.7
A0A287A784	Uncharacterized protein	5	9	2	54.4
A0A287A725	Uncharacterized protein	19	2	1	10.8
A0A287A703	Uncharacterized protein	30	19	8	39.9
A0A287A6Y9	Tubulin beta chain	48	57	1	49.9
A0A287A6V9	Carboxymethylenebutenolidase homolog	26	48	7	28.1
A0A287A6S6	PPARGC1 and ESRR induced regulator, muscle 1	4	5	2	89.4
A0A287A6Q0	Protein S	3	8	2	74.6
A0A287A6P1	Gelsolin	45	77	22	82.5
A0A287A608	AHNAK nucleoprotein	28	78	5	398.4
A0A287A5Z5	Prostaglandin E synthase 3 like	12	2	1	16
A0A287A5X0	Uncharacterized protein	24	19	6	37.7
A0A287A5T1	Abhydrolase domain containing 14B	31	9	4	22.5
A0A287A5S7	Dimethylarginine dimethylaminohydrolase 2	20	13	3	29.7
A0A287A5M7	Aldose reductase	59	92	14	35.8
A0A287A5I0	C-terminal binding protein 1	3	1	1	46.4
A0A287A531	Annexin	54	49	14	36.1
A0A287A4Z2	Superoxide dismutase	53	29	9	24.7
A0A287A4W6	RAB21, member RAS oncogene family	9	1	1	24.1
A0A287A4W0	Uncharacterized protein	8	45	9	302.6
A0A287A4R1	Actin, beta like 2	29	85	1	41.8
A0A287A424	Nitrilase 1	18	11	4	38
A0A287A3Y9	Alcohol dehydrogenase [NADP(+)]	29	27	7	39
A0A287A3W6	DDB1 and CUL4 associated factor 6	6	4	3	105.1
A0A287A3K5	Ribosomal protein S6 kinase	3	2	2	83.6
A0A287A3J9	Optineurin	6	4	3	61.4
A0A287A363	Afamin	35	49	18	70.2
A0A287A333	Alpha-1B-glycoprotein	40	82	17	55.4
A0A287A332	Uncharacterized protein	1	2	1	148.7
A0A287A328	Uncharacterized protein	6	4	1	23.4
A0A287A2X3	Carnitine	13	14	7	70.8
A0A287A291	Glycogen [starch] synthase	33	35	15	83.7
A0A287A286	Uncharacterized protein	4	1	1	24.7
A0A287A278	Uncharacterized protein	42	17	5	12.9
A0A287A275	Tubulin beta chain	69	76	4	49.8
A0A287A229	EH domain containing 1	24	16	8	60.5
A0A287A211	S-adenosylmethionine synthase	11	7	3	45.6
A0A287A1Z9	Eukaryotic translation initiation factor 4 gamma 1	6	15	6	176.8
A0A287A1Z0	Proteasome subunit beta	12	2	2	32.3
A0A287A1V5	Fructose-bisphosphate aldolase	68	383	25	46.9
A0A287A1S6	Collagen type I alpha 1 chain	3	3	3	139.2
A0A287A1G6	Uncharacterized protein	5	8	3	102.2
A0A287A1G4	PDZ and LIM domain 5	13	28	6	64.2
A0A287A1F9	Neurogenic differentiation factor	4	1	1	41.4
A0A287A1E7	Eukaryotic translation initiation factor 4E family member 3	7	1	1	24.3
A0A287A1B4	Uncharacterized protein	40	190	1	151.3
A0A287A194	Coiled-coil domain containing 178	1	4	1	87.4
A0A287A0M1	Uncharacterized protein	63	33	6	18.5
A0A287A0J0	Myosin light chain 12A	6	1	1	20.5
A0A287A0C8	Uncharacterized protein	9	4	1	13
A0A287A096	Eukaryotic translation initiation factor 2 subunit 1	25	14	6	36.1
A0A287A044	Aspartate aminotransferase	56	65	17	43.7
A0A287A042	Uncharacterized protein	8	27	11	206.8
A0A287A027	Uncharacterized protein	10	37	18	228.3
A0A286ZZM7	Thioredoxin domain containing 17	11	5	1	14.1
A0A286ZZL7	6-phosphofructokinase	6	11	2	87.1
A0A286ZZL6	Methylthioribulose-1-phosphate dehydratase	49	29	9	25.8
A0A286ZZ97	Caveolae associated protein 1	8	2	2	50.3
A0A286ZYW6	Uncharacterized protein	24	9	3	25.9
A0A286ZYS8	Cardiomyopathy associated 5	2	9	6	451.4
A0A286ZYQ7	Uncharacterized protein	41	18	2	16.4
A0A286ZYM6	ATP synthase peripheral stalk-membrane subunit b	5	1	1	28.6
A0A286ZYL7	ATP synthase subunit delta, mitochondrial	5	2	1	17.5
A0A286ZYL3	ABI family member 3 binding protein	5	1	1	39
A0A286ZYI7	Folliculin interacting protein 2	1	1	1	125.7
A0A286ZY48	Epsin 1	2	1	1	60.4
A0A286ZXV0	Microtubule-associated protein	15	18	6	70.1
A0A286ZXU8	LanC like 1	38	26	11	45.5
A0A286ZXT7	L-lactate dehydrogenase	55	254	23	48
A0A286ZXS0	Spectrin alpha, non-erythrocytic 1	1	1	1	274.5
A0A286ZXD9	Microtubule-associated protein	31	118	1	229.7
A0A286ZXA4	Uncharacterized protein	57	29	6	13.4
A0A286ZX40	Aminoacylase-1	37	59	14	48.3
A0A286ZX26	Cathepsin D	18	16	5	44.1
A0A286ZWS0	SH3 domain-binding glutamic acid-rich-like protein	11	1	1	10.4
A0A286ZWR7	Phosphoglucomutase 2 like 1	6	9	3	70.6
A0A286ZWN6	Uncharacterized protein	37	69	5	27.5
A0A286ZWJ9	Succinate--CoA ligase [GDP-forming] subunit beta, mitochondrial	19	9	4	49.5
A0A286ZWG1	NPL4 homolog, ubiquitin recognition factor	4	3	2	71.9
A0A286ZWF5	Uncharacterized protein	24	5	2	12.8
A0A286ZWB2	Galectin	43	35	7	20.5
A0A286ZWA5	Ubiquilin 2	8	3	2	65.7
A0A286ZW70	Peptidyl-prolyl cis-trans isomerase	21	6	4	23.8
A0A286ZVQ0	Acyl-CoA thioesterase 4	54	39	7	25.9
A0A286ZVL0	Heterogeneous nuclear ribonucleoprotein U	9	12	6	90.6
A0A286ZVJ4	Methionyl-tRNA synthetase	4	3	3	107.9
A0A286ZVG3	Thymosin beta	45	11	3	5.1
A0A286ZVF6	Uncharacterized protein	22	23	8	51.1
A0A286ZV33	Ubiquitin family domain containing 1	6	3	2	39.2
A0A286ZUZ1	Sorting nexin 2	3	1	1	59.1
A0A286ZUM8	Transitional endoplasmic reticulum ATPase	41	79	24	98.2
A0A286ZUM0	Chromosome 19 open reading frame 12	6	1	1	15
A0A286ZUK9	Uncharacterized protein	20	46	15	116.6
A0A286ZUK6	Tissue specific transplantation antigen P35B	3	2	1	42.7
A0A286ZUI9	Glycogenin 1	37	48	11	37.4
A0A286ZUF5	N(alpha)-acetyltransferase 50, NatE catalytic subunit	9	2	1	19.4
A0A286ZU36	Guanidinoacetate N-methyltransferase	25	20	4	26.5
A0A286ZTU7	Uncharacterized protein	22	44	5	46.2
A0A286ZTS1	Trans-L-3-hydroxyproline dehydratase	18	10	4	38.1
A0A286ZTN4	Nipsnap homolog 2	10	7	3	37.3
A0A286ZTI3	Uncharacterized protein	27	15	2	23.4
A0A286ZTB0	Selenium binding protein 1	67	93	26	56.1
A0A286ZTA4	Fructose-bisphosphate aldolase	41	18	8	39.7
A0A286ZT52	Proteasome 26S subunit, ATPase 3	14	15	5	54.8
A0A286ZSN6	Uncharacterized protein	2	1	1	73.5
A0A286ZSJ8	5'-nucleotidase	40	30	11	37.6
A0A286ZSJ7	Complement C1q C chain	20	9	4	26
A0A286ZSH3	Heme-binding protein 1	16	2	2	23.6
A0A286ZSH0	RCSD domain containing 1	31	24	8	50.4
A0A286ZS69	Proteasome subunit beta	27	15	5	22.8
A0A286ZRX4	Uncharacterized protein	28	34	7	36.2
A0A286ZRV9	Uncharacterized protein	18	14	1	20.8
A0A286ZRP4	Ribosomal protein L3 like	3	1	1	48.3
A0A286ZRJ3	Electron transfer flavoprotein subunit alpha	42	40	9	36.4
A0A286ZR86	Uncharacterized protein	3	1	1	55.1
A0A286ZR68	Uncharacterized protein	47	129	15	83.9
A0A286ZQY9	Ribulose-phosphate 3-epimerase	16	4	2	25
A0A286ZQY6	Isocitrate dehydrogenase [NAD] subunit, mitochondrial	11	9	3	39.6
A0A286ZQW0	Glutamyl-prolyl-tRNA synthetase	6	11	5	170.7
A0A286ZQQ8	Uncharacterized protein	29	17	1	16.3
A0A286ZQJ9	Uncharacterized protein	3	5	1	26.8
A0A286ZQD3	Peptidylprolyl isomerase	3	2	1	55.3
A0A286ZQC1	SGT1 homolog, MIS12 kinetochore complex assembly cochaperone	13	5	3	38.3
A0A286ZQB1	Queuosine salvage protein	4	5	2	43.4
A0A286ZQA5	60S ribosomal protein L7a	4	1	1	33.7
A0A286ZQ79	Adenylate kinase isoenzyme 1	60	86	15	23.4
A0A286ZQ65	Phosphatidylinositol-5-phosphate 4-kinase type 2 beta	3	2	1	47.3
A0A286ZQ54	Calcium-transporting ATPase	9	19	2	111.4
A0A286ZQ44	Dicarbonyl and L-xylulose reductase	18	8	3	25.6
A0A286ZQ31	Phosphoglycerate mutase	10	9	2	29.9
A0A286ZQ07	Solute carrier family 25 member 12	1	1	1	75
A0A286ZPY9	Actin-related protein 2/3 complex subunit 4	17	8	3	21.1
A0A286ZPY1	AHNAK nucleoprotein	36	51	1	129.4
A0A286ZPQ9	Uncharacterized protein	13	22	12	223.5
A0A286ZPF5	Mitogen-activated protein kinase	3	1	1	41.3
A0A286ZPE3	Heterogeneous nuclear ribonucleoprotein A1	3	2	1	38.8
A0A286ZPA2	Uncharacterized protein	6	3	1	36.8
A0A286ZP69	RAB7A, member RAS oncogene family	7	3	1	23.5
A0A286ZP65	Uncharacterized protein	9	1	1	11.4
A0A286ZP17	DnaJ heat shock protein family (Hsp40) member B2	4	1	1	35.4
A0A286ZP11	Protein S100	11	1	1	15.1
A0A286ZNY1	Tubulin alpha chain	50	60	3	49.9
A0A286ZNW1	Echinoderm microtubule associated protein like 2	14	26	9	91.8
A0A286ZNV2	Eukaryotic translation elongation factor 1 alpha 2	45	124	10	62.9
A0A286ZNR9	Uncharacterized protein	8	1	1	16.6
A0A286ZNH3	Reactive intermediate imine deaminase A homolog	33	5	3	14.4
A0A286ZND5	Uncharacterized protein	53	53	9	25
A0A286ZND3	Small ArfGAP 1	3	1	1	51
A0A286ZN52	Proteasome subunit beta	39	24	6	23
A0A286ZN47	ADP-ribosylation factor-like protein 3	6	3	1	21.9
A0A286ZN24	Inter-alpha-trypsin inhibitor heavy chain H4	49	175	1	102.2
A0A286ZMX6	Metallothionein	20	2	1	5.9
A0A286ZMW3	HGF activator	10	6	5	70.3
A0A286ZMV9	Uncharacterized protein	67	44	11	22
A0A286ZMV3	UBA domain containing 1	7	4	2	45
A0A286ZMS2	Complement C1s	11	7	5	76.7
A0A286ZM70	AHNAK nucleoprotein	26	67	7	377.4
A0A286ZLZ0	cAMP-dependent protein kinase catalytic subunit beta	29	32	3	46.2
A0A286ZLR0	Uncharacterized protein	94	23	2	11
A0A286ZLP7	Uncharacterized protein	22	5	3	24.4
A0A286ZLN6	Uncharacterized protein	23	12	1	16.5
A0A286ZLL3	Receptor of-activated protein C kinase 1	4	1	1	30.5
A0A286ZLK7	Uncharacterized protein	26	27	6	33.1
A0A286ZLG4	Uncharacterized protein	24	1	1	7
A0A286ZLA1	Eukaryotic translation initiation factor 4E binding protein 2	26	1	1	13
A0A286ZL79	Aldehyde dehydrogenase 7 family member A1	28	26	10	58.5
A0A286ZL61	Myosin IC	2	1	1	122
A0A286ZL42	Serine/threonine-protein phosphatase	24	18	7	38.3
A0A286ZKX2	Citrate synthase	29	29	10	44.6
A0A286ZKT6	Pyruvate dehydrogenase E1 alpha 2 subunit	2	1	1	41.2
A0A286ZKT1	Calcium/calmodulin dependent protein kinase II gamma	9	4	1	68
A0A286ZKR5	LSM6 homolog, U6 small nuclear RNA and mRNA degradation associated	9	1	1	9.1
A0A286ZKH3	Uncharacterized protein	55	58	12	28.8
A0A286ZKA5	Complement C1q B chain	6	2	1	26.2
A0A286ZK24	4-hydroxyphenylpyruvate dioxygenase	15	7	5	44.7
A0A286ZJV6	Annexin	41	59	15	46.9
A0A286ZJU5	Malignant T-cell-amplified sequence	29	18	4	20.5
A0A286ZJK1	Uncharacterized protein	31	66	26	138.5
A0A286ZJ53	Uncharacterized protein	60	24	4	22.2
A0A286ZIZ7	Copper chaperone for superoxide dismutase	3	1	1	29.4
A0A286ZIZ4	Polyadenylate-binding protein	8	10	4	72.3
A0A286ZIM7	NDRG family member 2	25	23	6	40.6
A0A286ZIJ9	ATP-dependent 6-phosphofructokinase	45	155	28	89
A0A286ZIG4	Pyridoxal kinase	5	3	1	35.8
A0A286ZIE8	Solute carrier family 25 member 4	23	22	7	33
A0A286ZIE2	Uncharacterized protein	50	49	15	47.8
A0A286ZI83	Amine oxidase	9	35	1	83.3
A0A286ZI55	Glycerol-3-phosphate dehydrogenase [NAD(+)]	76	175	23	37.7
A0A286ZI52	Heterogeneous nuclear ribonucleoprotein A2/B1	7	3	2	39.5
A0A286ZHZ3	Translin	4	3	1	26.2
A0A286ZFW3	Apolipoprotein H	49	37	3	38.3
A0A1W6R2B4	Mitsugumin 53	48	37	16	52.7
A0A1S6L948	Carboxylic ester hydrolase	3	1	1	61.9
A0A1B2TT55	Aspartate aminotransferase	62	130	22	46.4
A0A1B2TT50	Serine/threonine-protein phosphatase	37	21	7	35.6
A0A173G6H5	Septin 7 isoform 2	7	14	2	50.6
A0A173G6H3	Septin 8	5	9	1	55.7
A0A165DE67	CRIP2	8	3	1	22.6
A0A140TAK8	Apolipoprotein H	46	30	1	31.9
A0A0K1TQQ7	Carbonyl reductase 3	55	46	11	30.6
A0A0H5ANC0	Osteoglycin	6	3	2	34
A0A0E3KLW5	Nucleoside diphosphate linked moiety X-type motif 3	12	1	1	19.4
A0A0D5BWD2	Mitochondrial complement component 1 Q subcomponent-binding protein	5	1	1	31
A0A0A7BZH7	MHC class I antigen	23	8	4	40.7
A0A0A0MY60	Signal transducer and activator of transcription	2	1	1	90.9
A0A096ZXA2	Oxidative-stress responsive 1	11	11	4	58.2
A0A088CPQ8	MHC class II antigen	3	3	1	30.3
A0A075B7J0	Uncharacterized protein	26	7	1	10.2
A0A075B7I9	Uncharacterized protein	20	9	1	12.9
A0A075B7I6	Uncharacterized protein	30	11	1	14.6
A0A075B7I5	Uncharacterized protein	18	12	1	11.9
A0A068F143	Glutathione peroxidase	66	27	10	22.6
A0A068CA64	Mitochondrial apoptosis-inducing factor 1 transcript variant 1	2	1	1	66.8
A0A068C697	Large proline-rich protein BAG6 transcript variant 1	1	1	1	122.2
A0A024BTL2	Phosphorylase kinase gamma 1	2	2	1	44.8
Q9TSW1	Leucocyte antigen 2/2(SLA-2/2)	12	3	2	43.8
Q95JA4	Gelatinase A	3	1	1	73.6
Q8MJ17	Glyceraldehyde-3-phosphate dehydrogenase (Fragment)	88	138	1	6
Q8MI72	Complement regulator factor H	25	48	1	138.5
Q6Y0X5	Sulfotransferase	5	2	1	34.4
Q6Q781	Calpastatin	25	33	1	83.9
Q4Z8N7	Platelet-activating factor acetylhydrolase	2	1	1	49
Q32YV9	Proteasome 26S subunit non-ATPase 4	12	5	3	40.7
Q29286	Prothymosin alpha (Fragment)	35	7	3	11.9
Q1G1K7	Isocitrate dehydrogenase [NAD] subunit, mitochondrial	6	2	1	42.3
Q0Z8R0	Cystatin	12	1	1	15.7
M3V815	Heterogeneous nuclear ribonucleoprotein R	1	1	1	70.9
M3TYW5	Glutaminyl-tRNA synthetase	2	1	1	87.5
L8B0Y0	IgG heavy chain	37	111	1	51.4
L8AXM5	IgG heavy chain	37	120	1	51.7
K9J6K6	Early endosome antigen 1	1	1	1	161.7
K9J6I8	Dedicator of cytokinesis 2	0	1	1	211.7
K7N7E7	Mannosyl-oligosaccharide glucosidase	2	1	1	92.5
K7GRT4	N(alpha)-acetyltransferase 10, NatA catalytic subunit	5	1	1	26.4
K7GRK7	Uncharacterized protein	2	4	2	447.2
K7GR86	Neural cell adhesion molecule 1	2	1	1	122.9
K7GQV5	Glutathione S-transferase zeta 1	13	2	2	24.2
K7GNK7	Mitogen-activated protein kinase kinase 3	9	8	2	43.8
K7GMW4	SH3 domain containing kinase binding protein 1	2	2	1	79.7
K7GM88	Vacuolar protein sorting-associated protein 28 homolog	6	2	1	25.5
K7GLP8	Uncharacterized protein	12	11	6	67.7
K7GKY0	CD109 molecule	1	1	1	161.4
I3VKE6	Ceruloplasmin	41	200	35	125.5
I3LUM9	Eukaryotic translation initiation factor 2 subunit 3	17	8	5	51
I3LTW5	Uncharacterized protein	31	10	1	14.7
I3LTH4	Nucleotide binding protein 1	7	2	1	29.3
I3LQF8	Y-box binding protein 3	43	18	6	40.6
I3LQ84	Collagen type VI alpha 2 chain	1	1	1	102.7
I3LNY6	Nestin	12	16	13	184.7
I3LM93	Transportin 1	2	1	1	101.3
I3LM79	Dipeptidyl peptidase 9	1	1	1	102.1
I3LLD6	THUMP domain containing 1	3	1	1	40
I3LIA4	Guanidinoacetate N-methyltransferase	23	17	4	29.6
I3LDC3	NADH:ubiquinone oxidoreductase subunit B10	6	1	1	20.9
I3LBW5	Peptidyl-prolyl cis-trans isomerase	9	1	1	13.9
I3LAD5	Signal transducing adaptor molecule	2	1	1	56.1
I3L9J4	Uncharacterized protein	5	4	2	57.9
I3L9H4	PITH domain containing 1	9	1	1	24.2
I3L992	MAP7 domain containing 1	1	1	1	91
I3L8P8	Uncharacterized protein	1	1	1	187.9
I3L8K4	Eukaryotic translation initiation factor 5B	1	1	1	138.2
I3L8D0	Formin homology 2 domain containing 1	5	4	3	116.4
I3L7Z3	NudC domain containing 1	2	1	1	66.7
I3L650	Caldesmon 1	2	2	1	94
I3L578	Acid sensing ion channel subunit 3	4	1	1	58.5
F6QA36	Actin-related protein 2	3	4	1	45.3
F2Z5G5	ARP1 actin related protein 1 homolog A	6	1	1	42.6
F1SU09	Kinesin family member 17	2	1	1	113.4
F1SSR4	Uncharacterized protein	4	2	1	53.7
F1SRI6	Uncharacterized protein	3	1	1	29.2
F1SR89	Gamma-aminobutyric acid type A receptor alpha5 subunit	4	1	1	52.3
F1SQZ5	Solute carrier organic anion transporter family member	3	1	1	78.4
F1SQP4	NADH dehydrogenase [ubiquinone] 1 alpha subcomplex subunit 12	12	1	1	17.1
F1SPF6	RuvB-like helicase	4	1	1	50.2
F1SNT8	Uncharacterized protein	1	1	1	139.8
F1SLR1	Uncharacterized protein	12	3	2	27.7
F1SL80	Short chain dehydrogenase/reductase family 9C member 7	5	1	1	35.3
F1SKD5	Ubiquitin specific peptidase 15	1	1	1	112.4
F1SK17	Uncharacterized protein	3	1	1	60.7
F1SJT9	Uncharacterized protein	6	2	2	50.6
F1SIS1	Leucine rich repeat containing 49	3	1	1	78.7
F1SHC1	Tubulin alpha chain	43	65	1	49.9
F1SFL6	Cereblon	5	1	1	43.6
F1SFL1	ADP ribosylation factor like GTPase 8B	11	1	1	24.7
F1SFC8	RNA binding motif protein 48	2	1	1	42.9
F1SEA5	Ubiquitin associated protein 2	1	2	1	115.5
F1SE87	Uncharacterized protein	16	3	2	24.6
F1SE20	Plasminogen activator	2	1	1	63.4
F1SE06	Activator of HSP90 ATPase activity 1	10	2	2	38.3
F1SDX6	Transglutaminase 2	5	6	3	77.2
F1SA56	Protein farnesyltransferase subunit beta	2	1	1	48.8
F1S9P4	Uncharacterized protein	2	1	1	66.8
F1S7Z8	Dedicator of cytokinesis 7	0	1	1	261.6
F1S7S5	SUN domain containing ossification factor	1	1	1	138.3
F1S5J1	Leucine rich pentatricopeptide repeat containing	1	6	1	158.7
F1S269	RCSD domain containing 1	51	34	11	40.4
F1S1L1	Translocase of inner mitochondrial membrane 8A	11	1	1	11
F1S0P4	Uncharacterized protein	5	2	2	56.4
F1RYA3	Cysteinyl-tRNA synthetase	3	3	2	84.8
F1RX68	Serine/threonine-protein phosphatase	37	21	7	35.6
F1RWZ2	Pre-mRNA processing factor 4B	1	4	1	122.2
F1RWP3	Cytoglobin	5	1	1	21.4
F1RVA3	Sarcoglycan gamma	5	1	1	33.4
F1RUS8	Uncharacterized protein	4	1	1	39
F1RUR7	Cullin 2	5	4	3	87
F1RU27	Chromosome 11 open reading frame 68	4	1	1	33.2
F1RR07	Phosphoinositide phospholipase C	3	1	1	88.6
F1RQW6	Complement factor B	34	70	1	85.8
F1RQW2	Uncharacterized protein	15	39	21	192.3
F1RQU2	Uncharacterized protein	51	132	17	83.2
F1RQR4	EH domain containing 1	23	16	8	63.6
F1RPQ3	Proteasome 26S subunit, non-ATPase 14	4	1	1	34.6
F1RN43	Cullin 4A	6	6	4	87.7
F1RK48	Sarcalumenin	1	1	1	86.6
F1RGF7	DnaJ heat shock protein family (Hsp40) member C18	3	1	1	41.6
F1RGE7	Steroid receptor RNA activator 1	4	1	1	30.4
F1RFX9	Solute carrier family 25 member 11	5	1	1	36.8
F1REZ3	Versican	2	1	1	38.8
B7UCQ6	Ankyrin repeat domain 1 variant i6,7,8	3	2	1	37.7
B0FMQ3	Sarcoglycan beta	7	1	1	34.8
A0A287BTC2	DNA-(apurinic or apyrimidinic site) lyase	5	1	1	35.4
A0A287BS79	Uncharacterized protein	3	1	1	31
A0A287BPW8	NADH:ubiquinone oxidoreductase subunit B4	9	1	1	15.1
A0A287BPL0	Protein tyrosine phosphatase, receptor type B	1	1	1	248
A0A287BMT8	Uncharacterized protein	14	1	1	8.5
A0A287BLH9	Uncharacterized protein	19	2	2	23
A0A287BL83	Uncharacterized protein	59	42	1	30.5
A0A287BJ15	Geranylgeranyl transferase type-2 subunit beta	6	2	2	40.7
A0A287BET6	Adhesion G protein-coupled receptor B1	1	1	1	170.8
A0A287BEK2	Uncharacterized protein	12	1	1	26.9
A0A287B960	Myosin light chain kinase 3	5	7	1	74
A0A287B874	Integrin subunit alpha 11	1	1	1	142.6
A0A287B778	Ubiquitin conjugating enzyme E2	1	1	1	140.9
A0A287B5Q4	Reticulon	4	3	3	125.8
A0A287B4J2	Adenosylhomocysteinase	27	35	11	52.6
A0A287B4E4	Isoprenoid synthase domain containing	3	1	1	49.9
A0A287B0C3	ATP synthase subunit d, mitochondrial	15	4	2	19.5
A0A287B084	Echinoderm microtubule associated protein like 1	1	1	1	101.9
A0A287AYZ0	Striatin 3	2	2	1	87.4
A0A287AWQ9	Trafficking protein particle complex subunit	4	1	1	20.3
A0A287AUT4	Uncharacterized protein	3	1	1	29.5
A0A287AUQ4	Uncharacterized protein	3	1	1	67.4
A0A287AT05	Serum albumin	81	803	1	59.1
A0A287ART4	Uncharacterized protein	3	1	1	46.8
A0A287ARA7	Ecm29 proteasome adaptor and scaffold	2	2	2	204
A0A287AQ33	LanC like 2	3	1	1	55
A0A287APQ3	Proteasome activator subunit 4	2	2	2	211.2
A0A287APG0	STE20 like kinase	1	1	1	142.6
A0A287ANU5	Uncharacterized protein	12	2	1	15.7
A0A287AMU6	Uncharacterized protein	12	1	1	11.8
A0A287AMN8	Copine 5	1	2	1	67.5
A0A287AM51	Solute carrier family 16 member 1	3	1	1	54.2
A0A287AKZ9	V-type proton ATPase subunit G	19	2	1	13.7
A0A287AK88	Glutathione S-transferase	16	4	2	24.9
A0A287AJE5	Huntingtin interacting protein K	13	1	1	14.3
A0A287AIW3	Dynein cytoplasmic 1 light intermediate chain 1	4	1	1	56.6
A0A287AIP7	Acyl-CoA synthetase long chain family member 1	3	3	2	78
A0A287AHZ3	Xin actin binding repeat containing 2	1	1	1	376.8
A0A287AHD3	Echinoderm microtubule associated protein like 4	1	1	1	109
A0A287AGA4	6-phosphofructokinase	7	16	2	83.8
A0A287AFU9	Uncharacterized protein	5	4	1	29.3
A0A287AFK2	Troponin T, fast skeletal muscle	20	24	5	32.5
A0A287AFA9	Nudix hydrolase 9	7	2	2	39
A0A287AF78	Uncharacterized protein	11	1	1	22.5
A0A287AF47	Heparan sulfate proteoglycan 2	1	3	3	463.3
A0A287AF17	Uncharacterized protein	1	2	1	279
A0A287AD42	Methionine aminopeptidase 2	15	4	1	50.5
A0A287ABZ9	Alpha kinase 3	1	1	1	178.7
A0A287AB96	Serine/threonine-protein kinase WNK1	1	1	1	265.3
A0A287AAQ4	Microtubule-associated protein	16	8	1	52.7
A0A287AAI3	Non-histone chromosomal protein HMG-17	16	1	1	9.5
A0A287A909	Methyltransferase like 21C	8	2	1	29.3
A0A287A732	Coiled-coil domain containing 80	2	1	1	115.6
A0A287A2R9	Uncharacterized protein	50	60	11	29.2
A0A287A2J9	Cullin 3	1	1	1	88.9
A0A287A217	Tubulin beta chain	50	69	3	51.5
A0A287A1S1	Sec1 family domain containing 1	3	1	1	72.3
A0A287A195	Uncharacterized protein	24	39	1	16.2
A0A286ZRM2	Ankyrin repeat and LEM domain containing 1	4	4	1	56.7
A0A286ZRI0	COP9 signalosome subunit 7B	5	2	1	31.5
A0A286ZRE7	OTU deubiquitinase 4	1	1	1	123.3
A0A286ZQE4	Glyceraldehyde-3-phosphate dehydrogenase	54	723	1	38.9
A0A286ZNH2	Uncharacterized protein	57	48	1	25.6
A0A286ZLW8	Microtubule-associated protein	1	1	1	222.6
A0A286ZLI8	DEAD-box helicase 17	2	1	1	72.3
A0A286ZKK9	Uncharacterized protein	3	1	1	36
A0A1P8NW32	Protein arginine methyltransferase 1 isoform 2	15	5	4	42.4
A0A077ES32	ATP synthase protein 8	15	1	1	7.9
